# Supplementary material for: Carbocyclic pincer carbene complexes of ruthenium: syntheses and reversible hydrogenation
Source: Royal Society of Chemistry journal article supplement (doi:10.1039/d1dt02266k), 2021-01-01
Supplement: d1dt02266k1.pdf [file d1dt02266k1.pdf]

## Supporting Information

### Carbocyclic Pincer Carbene Complexes of Ruthenium: Syntheses and Reversible Hydrogenation

Nicholas R. Wiedmaier, Hartmut Schubert, Hermann A. Mayer, Lars Wesemann

|         |                                                                                                                     |
|---------|---------------------------------------------------------------------------------------------------------------------|
| Content |                                                                                                                     |
| 1       | Experimental Section .....2                                                                                         |
| 2       | Crystallographic Details .....3                                                                                     |
| 3       | NMR Data .....5                                                                                                     |
| 3.1     | $^1\text{H}$ , $^{13}\text{C}\{^1\text{H}\}$ , $^{31}\text{P}\{^1\text{H}\}$ spectra for compound <b>2</b> .....5   |
| 3.2     | $^1\text{H}$ , $^{13}\text{C}\{^1\text{H}\}$ , $^{31}\text{P}\{^1\text{H}\}$ spectra for compound <b>3</b> .....8   |
| 3.3     | $^1\text{H}$ , $^{13}\text{C}\{^1\text{H}\}$ , $^{31}\text{P}\{^1\text{H}\}$ spectra for compound <b>4</b> ..... 11 |
| 3.4     | $^1\text{H}$ , $^{13}\text{C}\{^1\text{H}\}$ , $^{31}\text{P}\{^1\text{H}\}$ spectra for compound <b>5</b> ..... 23 |
| 4       | Quantum chemical calculations ..... 26                                                                              |
| 5       | References ..... 28                                                                                                 |

## 1 Experimental Section

**General procedure for the dehydrogenation of complex 4.** Method A: BCH-P<sup>t</sup>Bu<sub>2</sub>-RuHCl **4** (0.033 mmol) was dissolved in toluene (15–20 mL) with or without an external chloride source (100 eq. NaCl, Et<sub>4</sub>NCl or 10 eq. HCl×Et<sub>2</sub>O). Subsequently the reaction mixture was heated under reflux for several days. Filtration, in case of excess of external chloride source, followed by evaporation of the solvent under reduced pressure and trituration with *n*-pentane (1 × 5 mL) results in the product mixture. Complex **2** was recovered in 49–79 % yield.

## 2 Crystallographic Details

Table 1S: Structure refinement table of compound **2**, **3**, **4**.

|                                             | <b>2</b>                                                                                                                                                                                           | <b>3</b>                                            | <b>4</b>                                            |
|---------------------------------------------|----------------------------------------------------------------------------------------------------------------------------------------------------------------------------------------------------|-----------------------------------------------------|-----------------------------------------------------|
| Empirical formula                           | C <sub>94</sub> H <sub>146</sub> Cl <sub>6</sub> P <sub>6</sub> Ru <sub>3</sub><br>3 ×<br>C <sub>29</sub> H <sub>47</sub> Cl <sub>2</sub> P <sub>2</sub> Ru<br>+ 1 × C <sub>7</sub> H <sub>8</sub> | C <sub>29</sub> H <sub>47</sub> ClP <sub>2</sub> Ru | C <sub>29</sub> H <sub>53</sub> ClP <sub>2</sub> Ru |
| M [g·mol <sup>-1</sup> ]                    | 1977.83                                                                                                                                                                                            | 594.12                                              | 600.17                                              |
| λ [Å]                                       | 0.71073                                                                                                                                                                                            | 0.71073                                             | 0.71073                                             |
| T [K]                                       | 100(2)                                                                                                                                                                                             | 100(2)                                              | 100(2)                                              |
| Crystal system                              | triclinic                                                                                                                                                                                          | monoclinic                                          | monoclinic                                          |
| Space group                                 | <i>P</i> 1                                                                                                                                                                                         | <i>P</i> 2 <sub>1</sub> / <i>c</i>                  | <i>C</i> <i>c</i>                                   |
| Z                                           | 1                                                                                                                                                                                                  | 4                                                   | 4                                                   |
| a [Å]                                       | 12.1104(2)                                                                                                                                                                                         | 13.4968(5)                                          | 8.3945(2)                                           |
| b [Å]                                       | 14.1717(3)                                                                                                                                                                                         | 17.6039(6)                                          | 21.4072(5)                                          |
| c [Å]                                       | 14.9865(3)                                                                                                                                                                                         | 12.2964(5)                                          | 16.9249(4)                                          |
| α [°]                                       | 67.4590(10)                                                                                                                                                                                        | 90                                                  | 90                                                  |
| β [°]                                       | 89.6070(10)                                                                                                                                                                                        | 104.829(2)                                          | 95.5880(10)                                         |
| γ [°]                                       | 88.4290(10)                                                                                                                                                                                        | 90                                                  | 90                                                  |
| V [Å <sup>3</sup> ]                         | 2374.66(8)                                                                                                                                                                                         | 2824.27(18)                                         | 3027.00(12)                                         |
| D <sub>c</sub> [g·cm <sup>-3</sup> ]        | 1.383                                                                                                                                                                                              | 1.397                                               | 1.317                                               |
| μ [mm <sup>-1</sup> ]                       | 0.784                                                                                                                                                                                              | 0.779                                               | 0.727                                               |
| F(000)                                      | 1034                                                                                                                                                                                               | 1248                                                | 1272                                                |
| Crystal size [mm]                           | 0.24 × 0.21 × 0.20                                                                                                                                                                                 | 0.19 × 0.16 × 0.15                                  | 0.18 × 0.15 × 0.12                                  |
| Θ range [°]                                 | 2.94 – 30.52                                                                                                                                                                                       | 3.38 – 29.55                                        | 2.62 – 28.28                                        |
| Limiting indices                            | -15 ≤ h ≤ 15<br>-18 ≤ k ≤ 18<br>-19 ≤ l ≤ 19                                                                                                                                                       | -18 ≤ h ≤ 17<br>-24 ≤ k ≤ 24<br>-17 ≤ l ≤ 17        | -11 ≤ h ≤ 11<br>-28 ≤ k ≤ 28<br>-21 ≤ l ≤ 22        |
| Reflections collected                       | 69257                                                                                                                                                                                              | 30789                                               | 25834                                               |
| Independent                                 | 20132                                                                                                                                                                                              | 7884                                                | 7213                                                |
| R <sub>int</sub>                            | 0.0333                                                                                                                                                                                             | 0.0254                                              | 0.0346                                              |
| Completeness                                | 99.5                                                                                                                                                                                               | 99.4                                                | 99.2                                                |
| Absorption correction                       | multi-scan                                                                                                                                                                                         | multi-scan                                          | multi-scan                                          |
| Max. , Min.                                 | 0.7461, 0.7213                                                                                                                                                                                     | 0.7459, 0.7061                                      | 0.7457, 0.6920                                      |
| Parameters/restraints                       | 1019/3                                                                                                                                                                                             | 322/ 0                                              | 318/ 5                                              |
| R <sub>1</sub> , wR <sub>2</sub> [I > 2σI]  | 0.0279, 0.0657                                                                                                                                                                                     | 0.0247, 0.0593                                      | 0.0253, 0.0515                                      |
| R <sub>1</sub> , wR <sub>2</sub> (all data) | 0.0297, 0.0667                                                                                                                                                                                     | 0.0307, 0.0620                                      | 0.0289, 0.0526                                      |
| Goof on F <sup>2</sup>                      | 1.037                                                                                                                                                                                              | 1.033                                               | 1.008                                               |
| Peak/ hole [e·Å <sup>-3</sup> ]             | 2.331, -0.754                                                                                                                                                                                      | 0.806, -0.403                                       | 0.709, -0.351                                       |
| Flack                                       | 0.010(8)                                                                                                                                                                                           |                                                     |                                                     |
| CCDC                                        | 2036979                                                                                                                                                                                            | 2036978                                             | 2036977                                             |

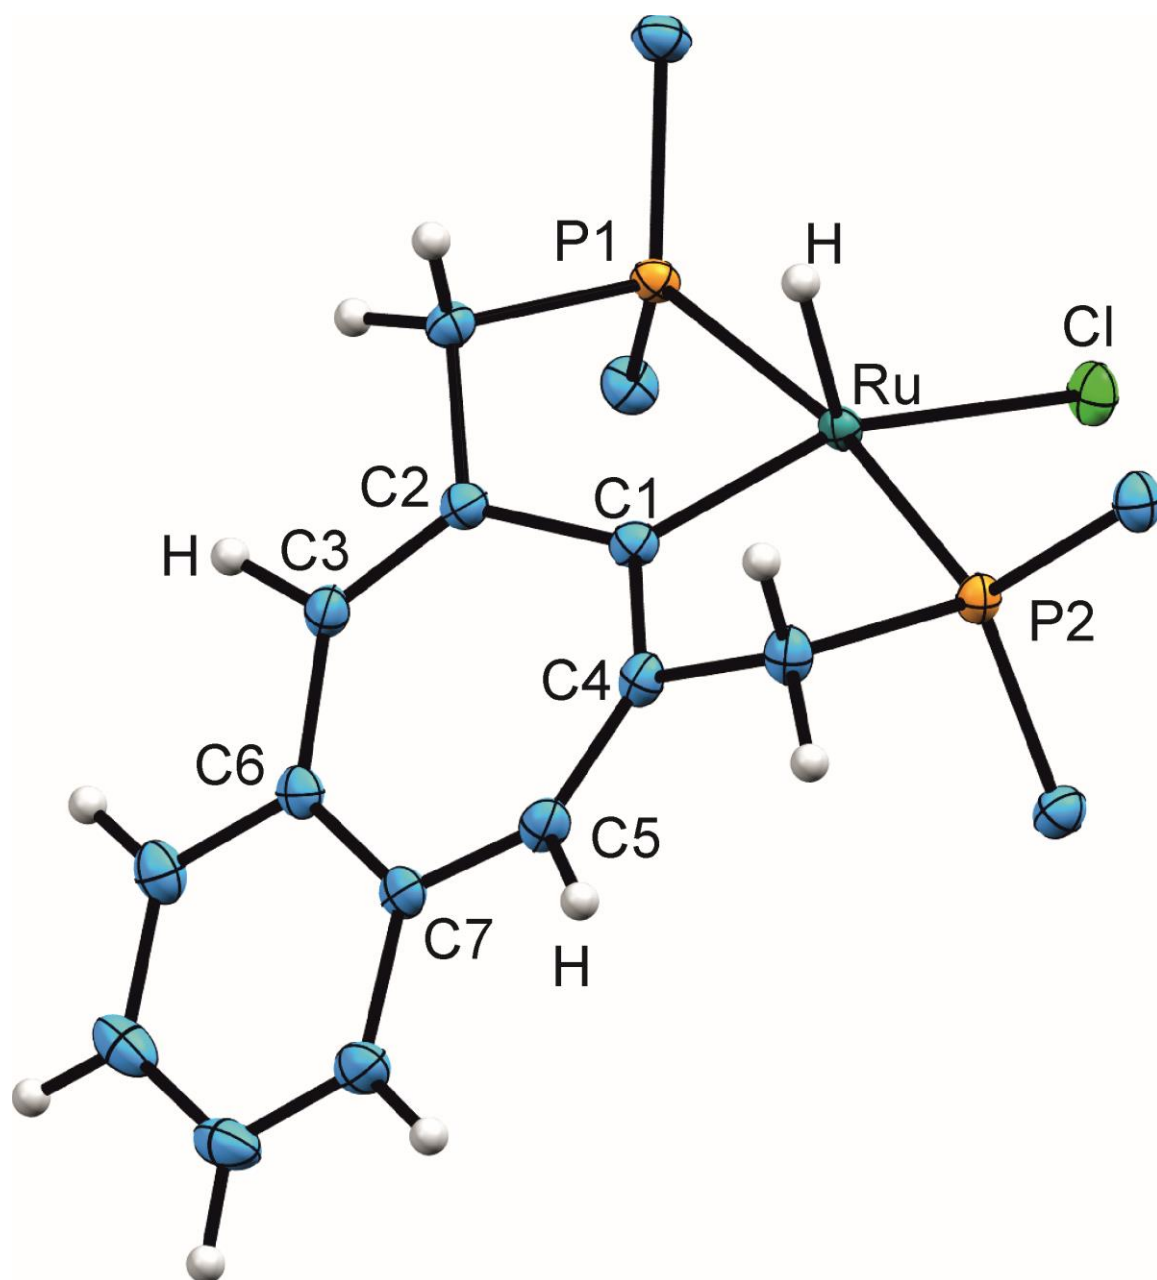

Figure S1. ORTEP (50% thermal ellipsoids) with selected atom labeling of **3**. <sup>t</sup>Bu groups were omitted for clarity. Selected interatomic distances [Å] and angles [deg]: H1-Ru 1.70(3), C-Ru 1.9286(15), P1-Ru 2.3311(4), P2-Ru 2.3267(4), Ru-Cl 2.4318(4), P2-Ru1-P1 169.183(14), H1-Ru-C 86.6(8), H1-Ru1-Cl 119.8(8), C-Ru-Cl 153.65(5), C1-C4 1.480(2), C1-C2 1.477(2), C2-C3 1.359(2), C4-C5 1.361(2), C5-C7 1.451(2), C3-C6 1.446(2), C6-C7 1.413(2).

### 3 NMR Data

#### 3.1 $^1\text{H}$ , $^{13}\text{C}\{^1\text{H}\}$ , $^{31}\text{P}\{^1\text{H}\}$ spectra for compound **2**

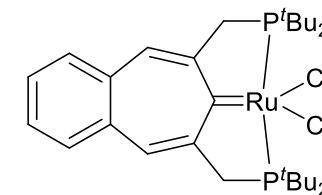

**2**

1H\_NMR\_C6D6\_BCHT-PtBu2-RuCl2

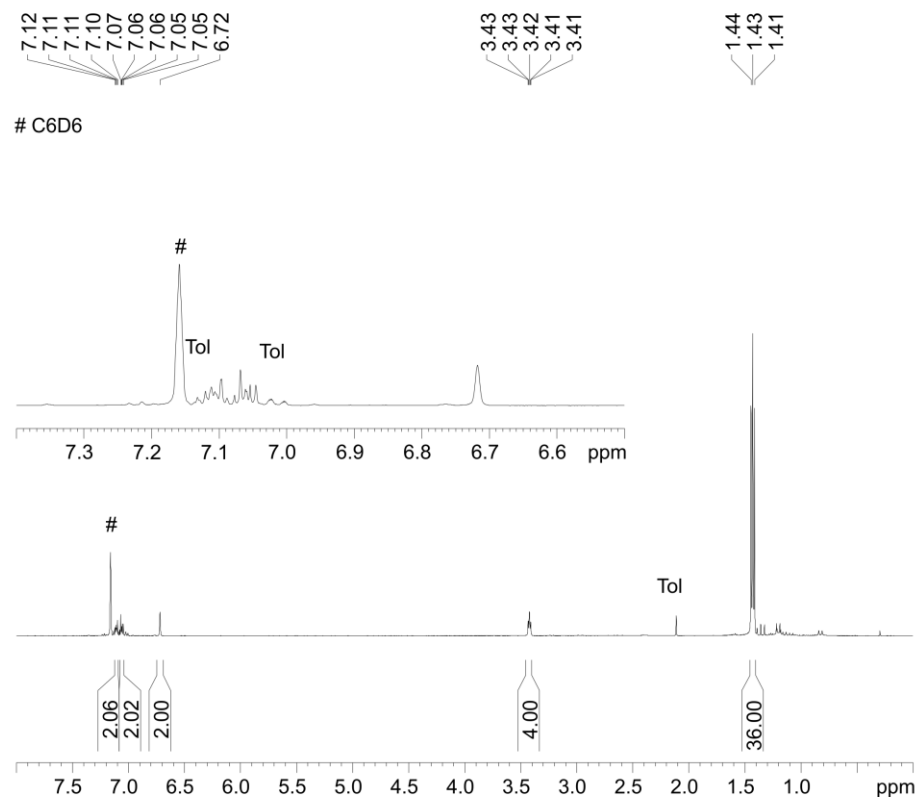

Current Data Parameters  
NAME NW861-310720-1  
EXPNO 10  
PROCNO 1

F2 - Acquisition Parameters  
Date\_ 20200731  
Time 10.36  
INSTRUM spect  
PROBHD 5 mm QNP 1H/13  
PULPROG zg30  
TD 52656  
SOLVENT C6D6  
NS 32  
DS 0  
SWH 16025.641 Hz  
FIDRES 0.304346 Hz  
AQ 1.6428672 sec  
RG 362  
DW 31.200 usec  
DE 6.00 usec  
TE 300.2 K  
D1 1.00000000 sec  
TD0 1

===== CHANNEL f1 =====  
NUC1 1H  
P1 14.60 usec  
PL1 -3.00 dB  
PL1W 16.03799057 W  
SFO1 400.1100000 MHz

F2 - Processing parameters  
SI 65536  
SF 400.1100000 MHz  
WDW EM  
SSB 0  
LB 0 Hz  
GB 0  
PC 1.00

Figure S1.  $^1\text{H}$  NMR spectrum of complex **2**.

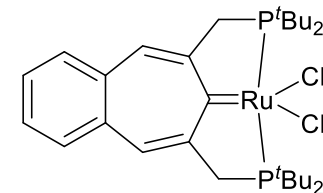

**2**

13C\_NMR\_C6D6\_BCHT-PtBu2-RuCl2

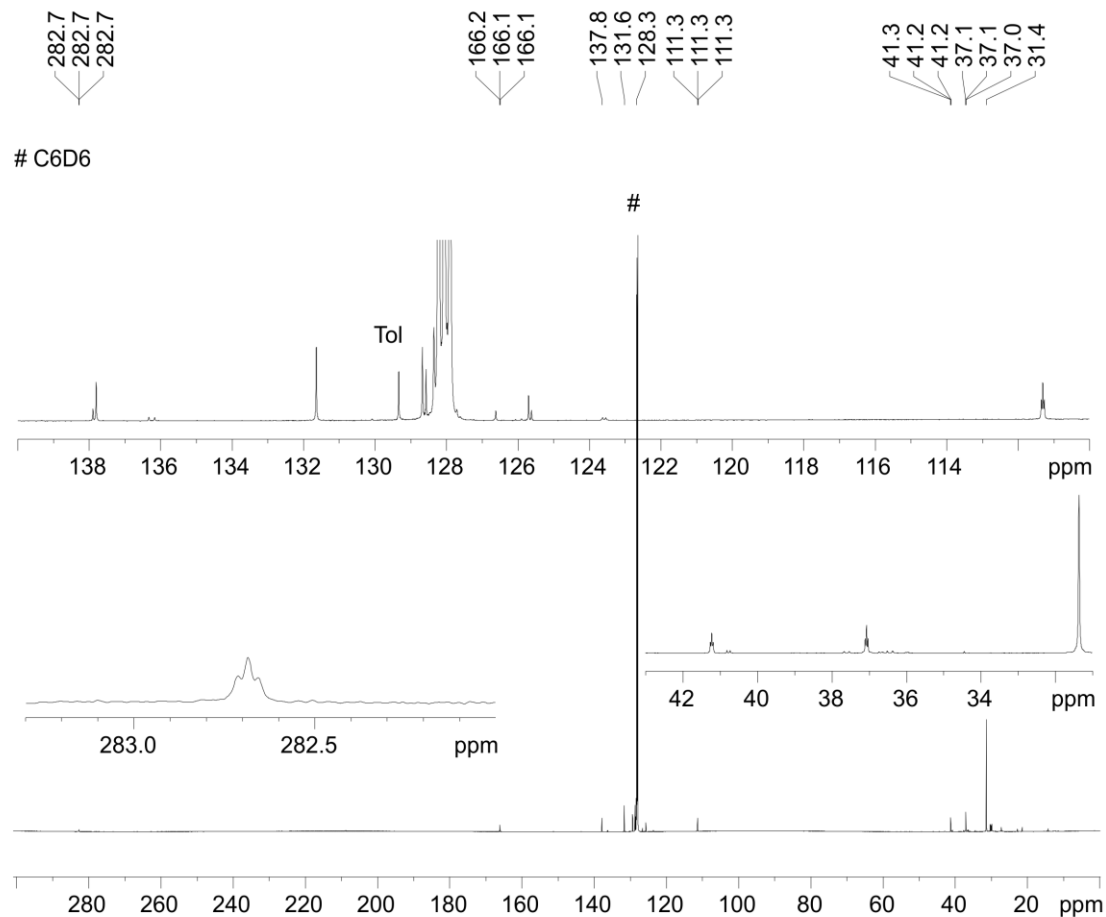

Current Data Parameters  
 NAME NW714\_600\_20200508  
 EXPNO 12  
 PROCNO 1

F2 - Acquisition Parameters  
 Date\_ 20200510  
 Time 4.31 h  
 INSTRUM spect  
 PROBHD Z126545\_0027 (  
 PULPROG udeflt  
 TD 32722  
 SOLVENT C6D6  
 NS 3072  
 DS 8  
 SWH 45454.547 Hz  
 FIDRES 2.778225 Hz  
 AQ 0.3599420 sec  
 RG 189.6  
 DW 11.000 usec  
 DE 18.00 usec  
 TE 298.0 K  
 D1 4.00000000 sec  
 D12 0.00002000 sec  
 D20 20.00000000 sec  
 TD0 1  
 SFO1 150.9254439 MHz  
 NUC1 13C  
 P1 10.00 usec  
 P13 2000.00 usec  
 P26 500.00 usec  
 PLW1 57.02700043 W  
 SPNAM[5] Crp60comp.4  
 SPOAL5 0.500  
 SPOFFS5 0 Hz  
 SPW5 8.71310043 W  
 SPNAM[8] Crp60.0.5.20.1  
 SPOAL8 0.500  
 SPOFFS8 0 Hz  
 SPW8 8.71310043 W  
 SFO2 600.1324005 MHz  
 NUC2 1H  
 CPDPRG[2] waltz16  
 PCPD2 70.00 usec  
 PLW2 23.41200066 W  
 PLW12 0.68803000 W

F2 - Processing parameters  
 SI 131072  
 SF 150.9027531 MHz  
 WDW EM  
 SSB 0  
 LB 2.00 Hz  
 GB 0  
 PC 1.40

Figure S2.  $^{13}\text{C}\{^1\text{H}\}$  NMR spectrum of complex **2**.

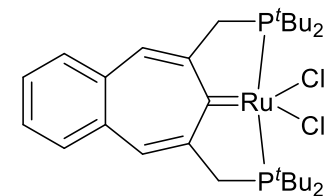

**2**

31P\_NMR\_C6D6\_BCHT-PtBu2-RuCl2

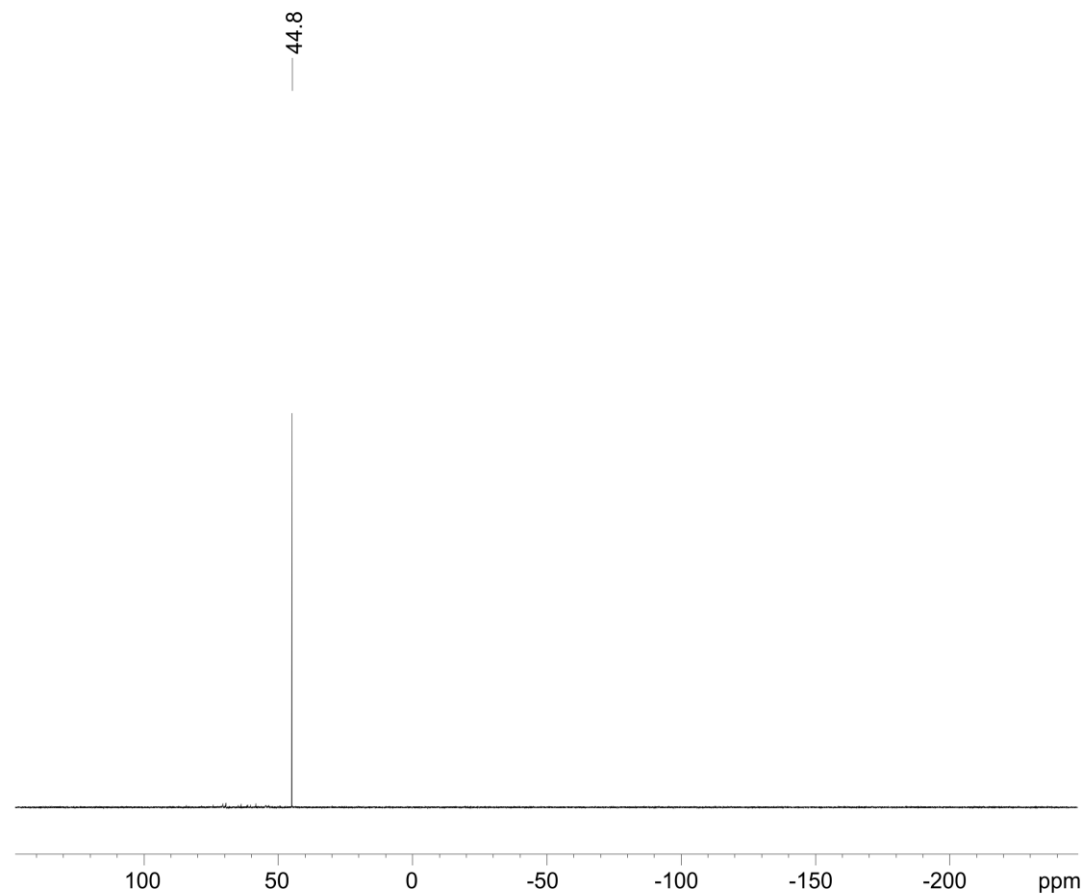

Current Data Parameters  
 NAME NW714\_600\_20200508  
 EXPNO 11  
 PROCNO 1

F2 - Acquisition Parameters

Date\_ 20200510  
 Time\_ 0.25 h  
 INSTRUM spect  
 PROBHD Z126545\_0027 (  
 PULPROG zgpg30  
 TD 65536  
 SOLVENT C6D6  
 NS 16  
 DS 4  
 SWH 96153.844 Hz  
 FIDRES 2.934382 Hz  
 AQ 0.3407872 sec  
 RG 189.6  
 DW 5.200 usec  
 DE 18.00 usec  
 TE 298.0 K  
 D1 2.00000000 sec  
 D11 0.03000000 sec  
 TD0 1  
 SFO1 242.9249301 MHz  
 NUC1 31P  
 P1 12.00 usec  
 PLW1 52.43000031 W  
 SFO2 600.1324005 MHz  
 NUC2 1H  
 CPDPRG[2] waltz16  
 PCPD2 70.00 usec  
 PLW2 23.41200066 W  
 PLW12 0.68803000 W  
 PLW13 0.34606999 W

F2 - Processing parameters

SI 32768  
 SF 242.9370770 MHz  
 WDW EM  
 SSB 0  
 LB 1.00 Hz  
 GB 0  
 PC 1.40

Figure S3.  $^{31}\text{P}\{^1\text{H}\}$  NMR spectrum of complex **2**.

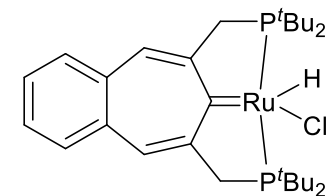

3

### 3.2 $^1\text{H}$ , $^{13}\text{C}\{^1\text{H}\}$ , $^{31}\text{P}\{^1\text{H}\}$ spectra for compound 3

1H\_NMR\_C6D6\_BCHT-PtBu2-RuHCl

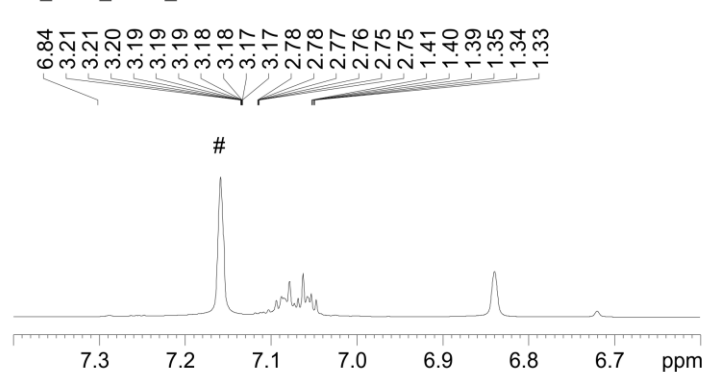

# C6D6

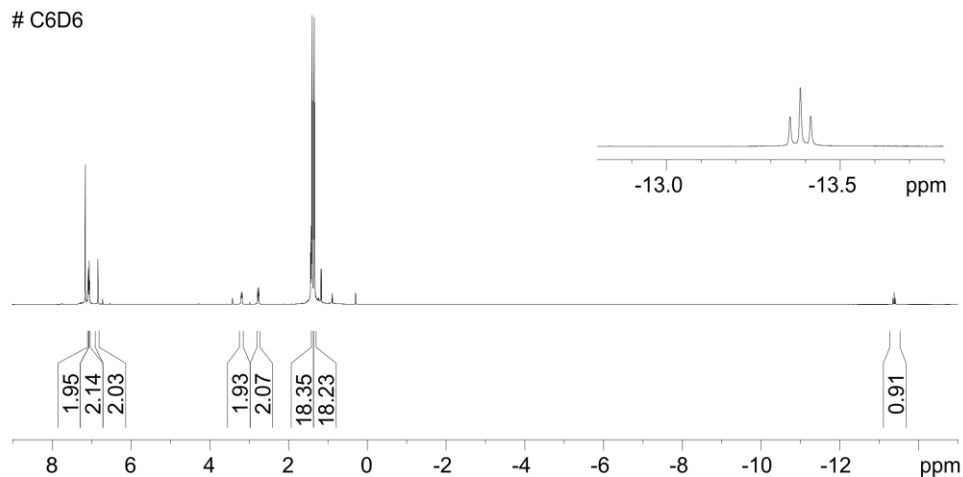

Current Data Parameters

NAME NW239-050319-600\_Nacht  
EXPNO 10  
PROCNO 1

F2 - Acquisition Parameters

Date\_ 20190305  
Time 15.08 h  
INSTRUM spect  
PROBHD Z126545\_0027 (  
PULPROG zg30  
TD 65536  
SOLVENT C6D6  
NS 32  
DS 0  
SWH 14423.077 Hz  
FIDRES 0.440157 Hz  
AQ 2.2719147 sec  
RG 19.61  
DW 34.667 usec  
DE 10.00 usec  
TE 298.0 K  
D1 1.00000000 sec  
TD0 1  
SFO1 600.1281996 MHz  
NUC1  $^1\text{H}$   
P1 12.00 usec  
PLW1 23.41200066 W

F2 - Processing parameters

SI 65536  
SF 600.1299958 MHz  
WDW EM  
SSB 0  
LB 0.30 Hz  
GB 0  
PC 1.00

Figure S4.  $^1\text{H}$  NMR spectrum of complex 3.



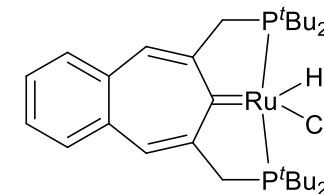

3

13C\_NMR\_C6D6\_BCHT-PtBu2-RuHCl

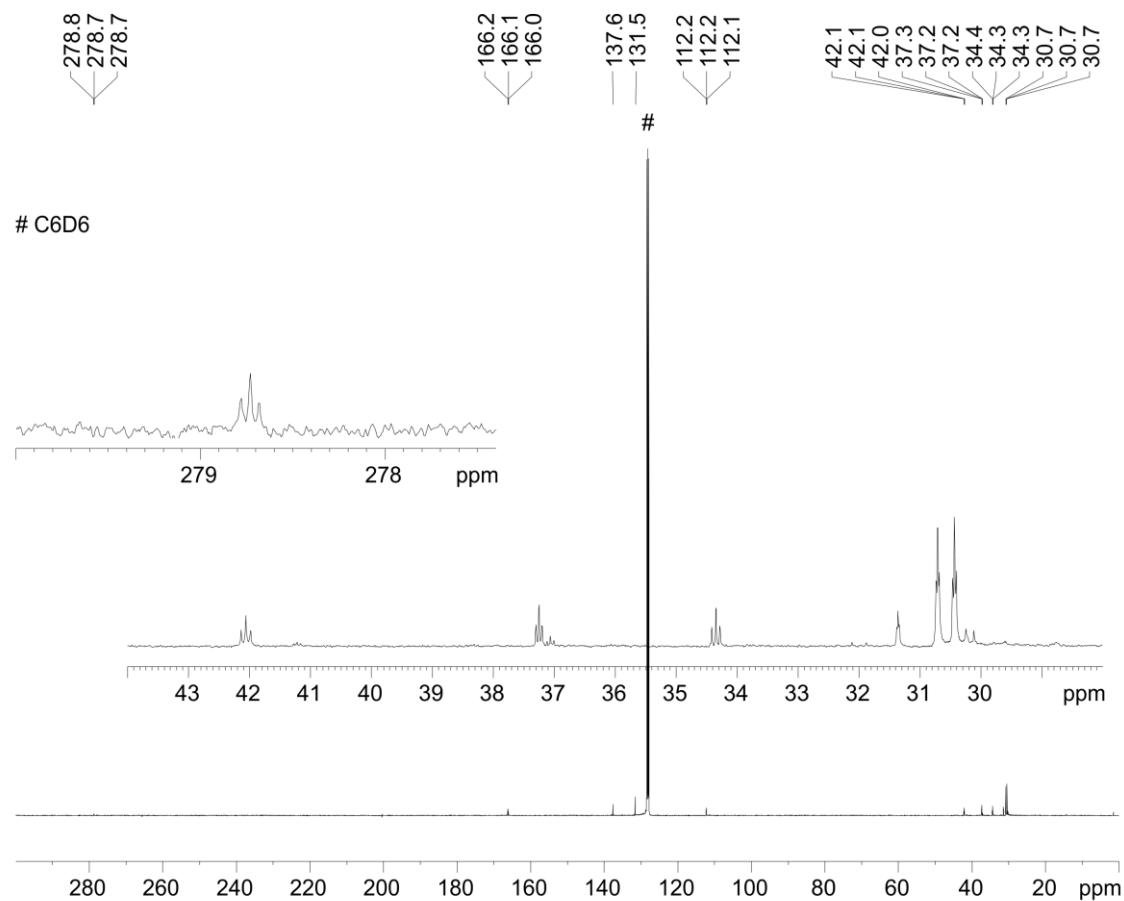

Current Data Parameters  
 NAME NW262-260319-Nacht\_2  
 EXPNO 12  
 PROCNO 1

F2 - Acquisition Parameters  
 Date\_ 20190327  
 Time 7.22  
 INSTRUM spect  
 PROBHD 5 mm QNP 1H/13  
 PULPROG zgpg30  
 TD 53700  
 SOLVENT C6D6  
 NS 23552  
 DS 0  
 SWH 40760.871 Hz  
 FIDRES 0.759048 Hz  
 AQ 0.6587200 sec  
 RG 32800  
 DW 12.267 usec  
 DE 6.00 usec  
 TE 299.2 K  
 D1 1.00000000 sec  
 D11 0.03000000 sec  
 TD0 1

===== CHANNEL f1 =====  
 NUC1 13C  
 P1 13.50 usec  
 PL1 -4.16 dB  
 PL1W 78.55633545 W  
 SFO1 100.6278616 MHz

===== CHANNEL f2 =====  
 CPDPRG[2] waltz16  
 NUC2 1H  
 PCPD2 80.00 usec  
 PL2 -3.00 dB  
 PL12 11.77 dB  
 PL13 13.14 dB  
 PL2W 16.03799057 W  
 PL12W 0.53474891 W  
 PL13W 0.39007664 W  
 SFO2 400.1120007 MHz

F2 - Processing parameters  
 SI 65536  
 SF 100.6077017 MHz  
 WDW EM  
 SSB 0  
 LB 1.00 Hz  
 GB 0  
 PC 1.40

Figure S5.  $^{13}\text{C}\{^1\text{H}\}$  NMR spectrum of complex 3.

31P\_NMR\_C6D6\_BCHT-PtBu2-RuHCl

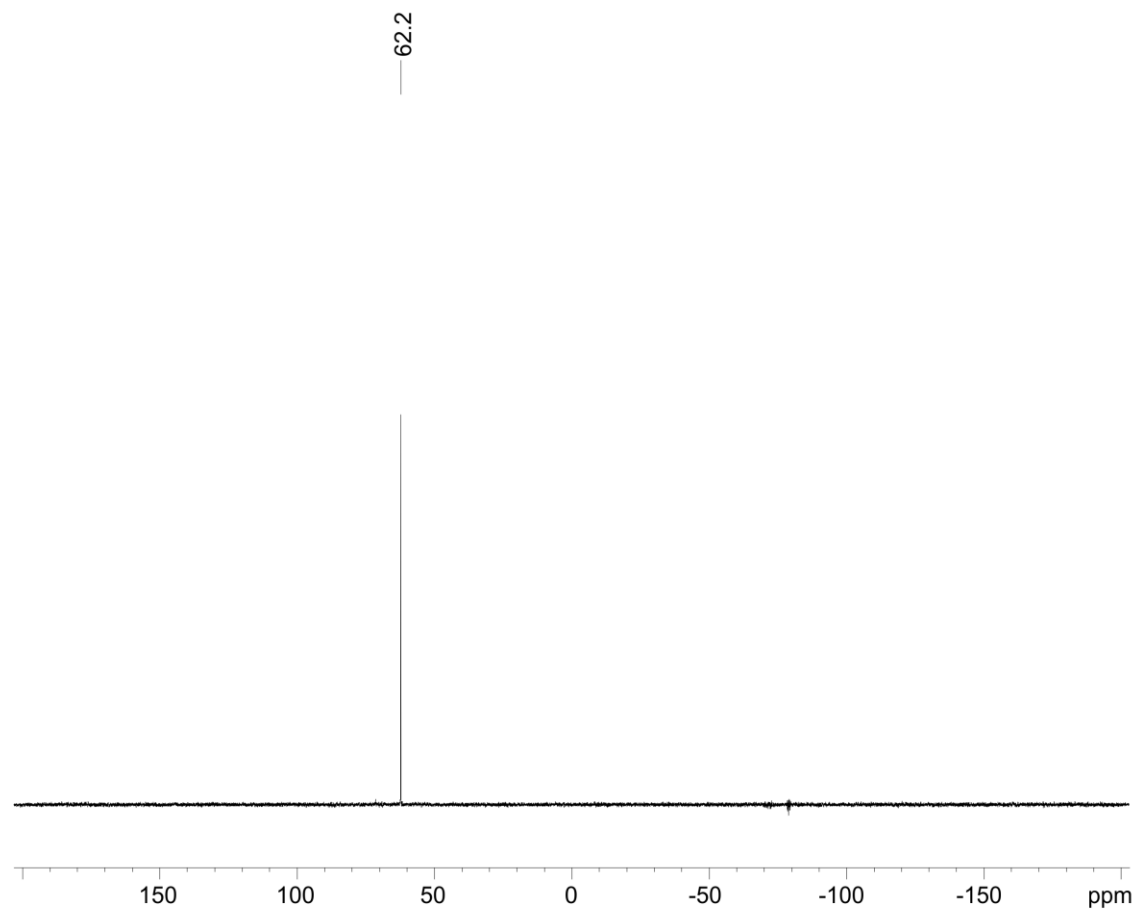

Current Data Parameters  
NAME NW863-110820-1  
EXPNO 11  
PROCNO 1

F2 - Acquisition Parameters  
Date\_ 20200811  
Time 9.30  
INSTRUM spect  
PROBHD 5 mm QNP 1H/13  
PULPROG zgpg30  
TD 88150  
SOLVENT C6D6  
NS 128  
DS 0  
SWH 65789.477 Hz  
FIDRES 0.746336 Hz  
AQ 0.6699400 sec  
RG 23100  
DW 7.600 usec  
DE 6.00 usec  
TE 300.2 K  
D1 1.00000000 sec  
D11 0.03000000 sec  
TD0 1

===== CHANNEL f1 =====  
NUC1  $^{31}\text{P}$   
P1 11.00 usec  
PL1 -3.00 dB  
PL1W 45.10684967 W  
SFO1 161.9674970 MHz

===== CHANNEL f2 =====  
CPDPRG[2] waltz16  
NUC2  $^1\text{H}$   
PCPD2 80.00 usec  
PL2 -3.00 dB  
PL12 11.77 dB  
PL13 13.14 dB  
PL2W 16.03799057 W  
PL12W 0.53474891 W  
PL13W 0.39007664 W  
SFO2 400.1120007 MHz

F2 - Processing parameters  
SI 131072  
SF 161.9674970 MHz  
WDW EM  
SSB 0  
LB 3.00 Hz  
GB 0  
PC 1.40

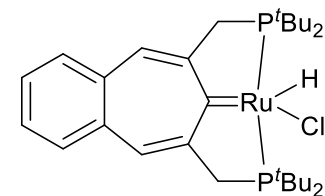

**3**

Figure S6.  $^{31}\text{P}\{^1\text{H}\}$  NMR spectrum of complex 3.

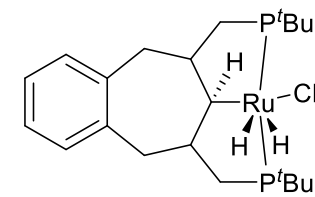

4

### 3.3 $^1\text{H}$ , $^{13}\text{C}\{^1\text{H}\}$ , $^{31}\text{P}\{^1\text{H}\}$ spectra for compound 4

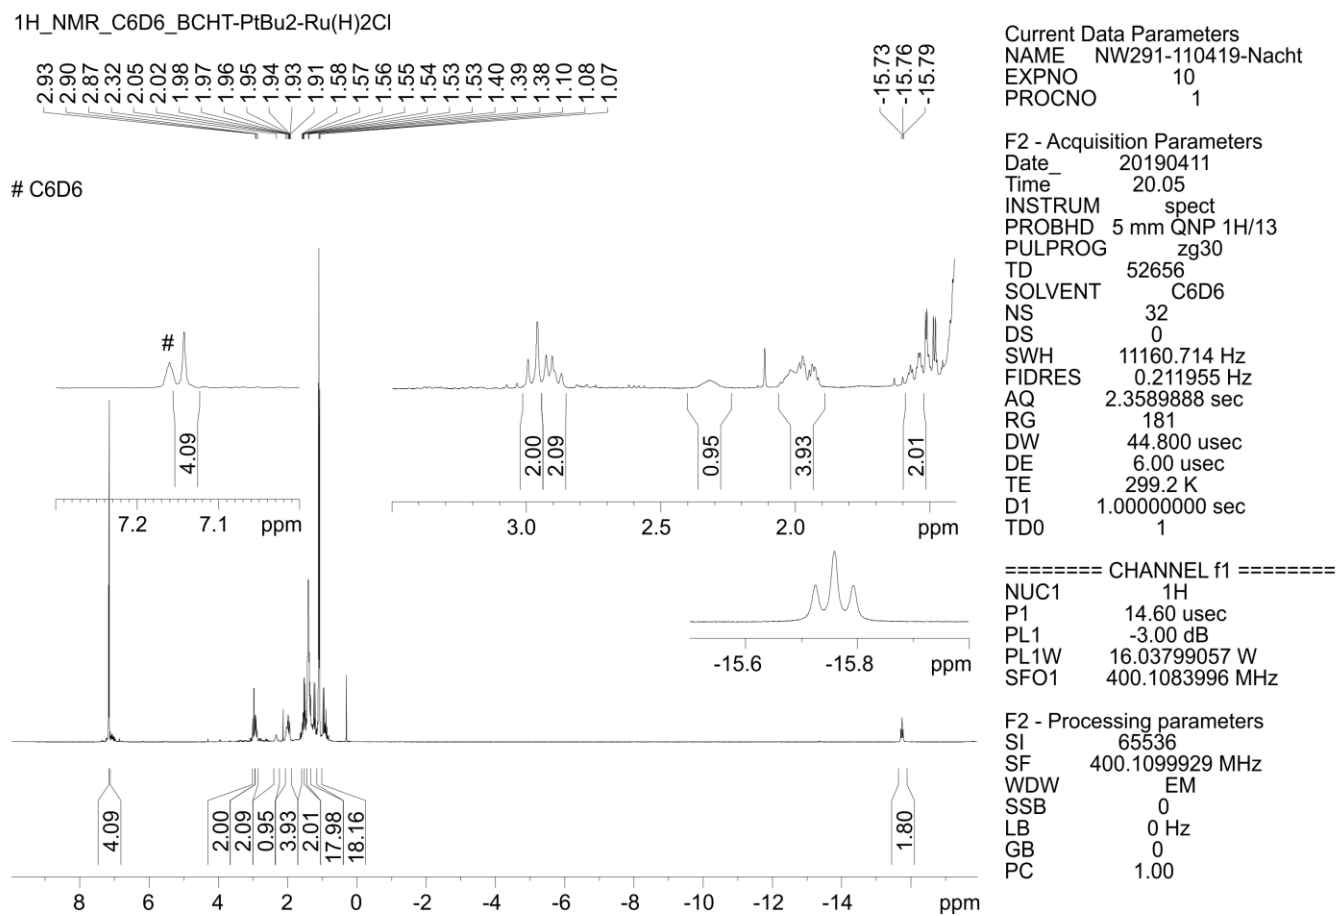

Figure S7.  $^1\text{H}$  NMR spectrum of complex 4.

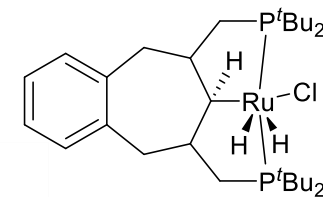

4

$^{13}\text{C}_\text{NMR}$ \_C6D6\_BCHT-PtBu2-Ru(H)2Cl

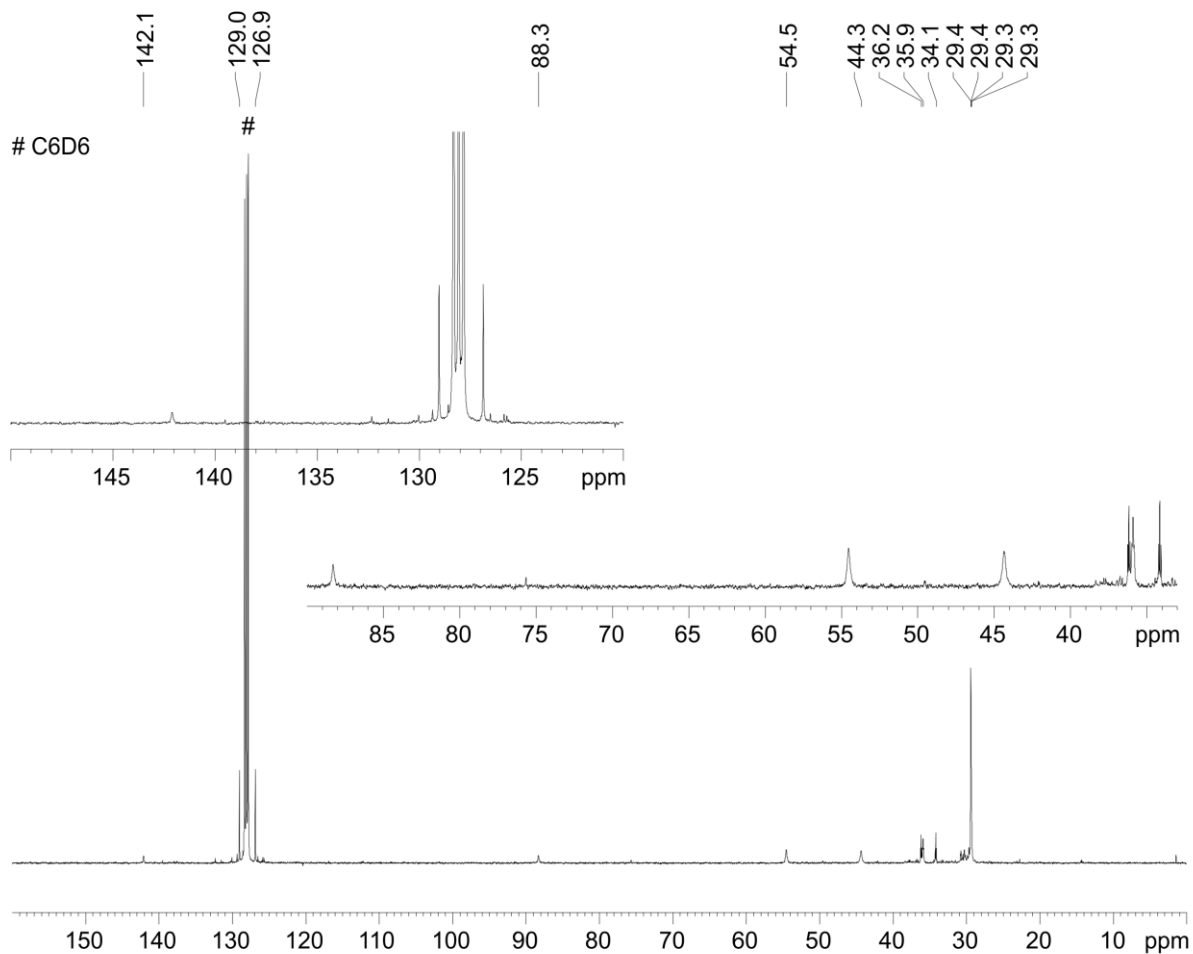

Current Data Parameters  
 NAME NW291-110419-Nacht  
 EXPNO 13  
 PROCNO 1

F2 - Acquisition Parameters  
 Date\_ 20190412  
 Time 4.08  
 INSTRUM spect  
 PROBHD 5 mm QNP 1H/13  
 PULPROG udef  
 TD 22218  
 SOLVENT C6D6  
 NS 7680  
 DS 0  
 SWH 30864.197 Hz  
 FIDRES 1.389153 Hz  
 AQ 0.3599316 sec  
 RG 32800  
 DW 16.200 usec  
 DE 6.00 usec  
 TE 299.2 K  
 D1 3.00000000 sec  
 D11 0.03000000 sec  
 D12 0.00002000 sec  
 D20 100.00000000 sec  
 TD0 1

===== CHANNEL f1 =====  
 NUC1  $^{13}\text{C}$   
 P1 13.50 usec  
 P13 2000.00 usec  
 P26 500.00 usec  
 PL1 -4.16 dB  
 PL1W 78.55633545 W  
 SFO1 100.6198135 MHz  
 SP8 1.39 dB  
 SP13 1.39 dB  
 SPNAM[8] Crp60.0.5.20.1  
 SPNAM[13] Crp60comp.4  
 SPOAL8 0.500  
 SPOAL13 0.500  
 SPOFFS8 0 Hz  
 SPOFFS13 0 Hz

===== CHANNEL f2 =====  
 CPDPRG[2] waltz16  
 NUC2  $^1\text{H}$   
 PCPD2 80.00 usec  
 PL2 -3.00 dB  
 PL12 11.77 dB  
 PL2W 16.03799057 W  
 PL12W 0.53474891 W  
 SFO2 400.1120007 MHz

F2 - Processing parameters  
 SI 131072  
 SF 100.6077001 MHz  
 WDW EM  
 SSB 0  
 LB 2.00 Hz  
 GB 0  
 PC 1.40

Figure S8.  $^{13}\text{C}\{^1\text{H}\}$  NMR spectrum of complex 4.

31P\_NMR\_C6D6\_BCHT-PtBu2-Ru(H)2Cl

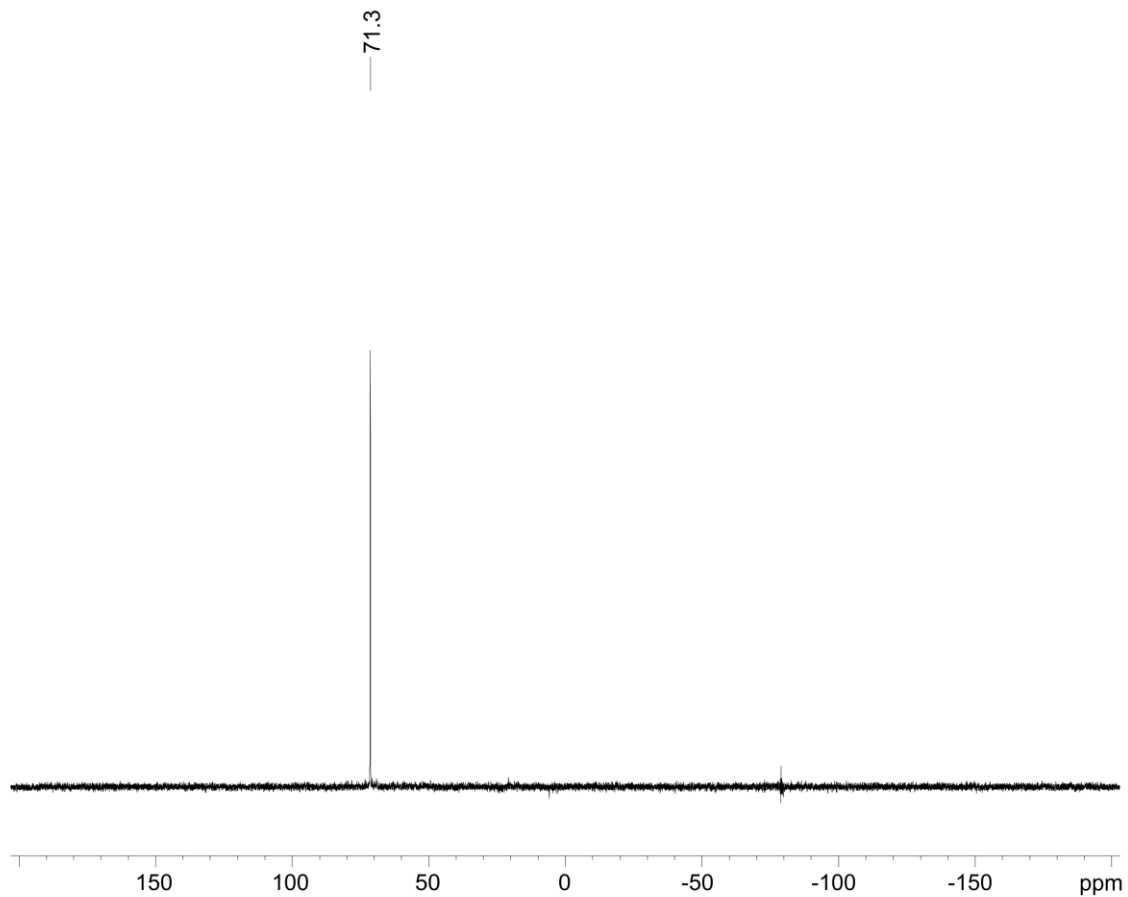

Current Data Parameters  
NAME NW874-180820-1  
EXPNO 11  
PROCNO 1

F2 - Acquisition Parameters  
Date\_ 20200818  
Time\_ 12.20  
INSTRUM spect  
PROBHD 5 mm QNP 1H/13  
PULPROG zgpg30  
TD 88150  
SOLVENT C6D6  
NS 64  
DS 0  
SWH 65789.477 Hz  
FIDRES 0.746336 Hz  
AQ 0.6699400 sec  
RG 23100  
DW 7.600 usec  
DE 6.00 usec  
TE 300.2 K  
D1 1.0000000 sec  
D11 0.03000000 sec  
TD0 1

===== CHANNEL f1 =====  
NUC1 31P  
P1 11.00 usec  
PL1 -3.00 dB  
PL1W 45.10684967 W  
SFO1 161.9674970 MHz

===== CHANNEL f2 =====  
CPDPRG[2] waltz16  
NUC2 1H  
PCPD2 80.00 usec  
PL2 -3.00 dB  
PL12 11.77 dB  
PL13 13.14 dB  
PL2W 16.03799057 W  
PL12W 0.53474891 W  
PL13W 0.39007664 W  
SFO2 400.1120007 MHz

F2 - Processing parameters  
SI 131072  
SF 161.9674970 MHz  
WDW EM  
SSB 0  
LB 3.00 Hz  
GB 0  
PC 1.40

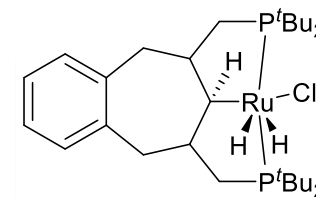

**4**

Figure S9.  $^{31}\text{P}\{^1\text{H}\}$  NMR spectrum of complex **4**.

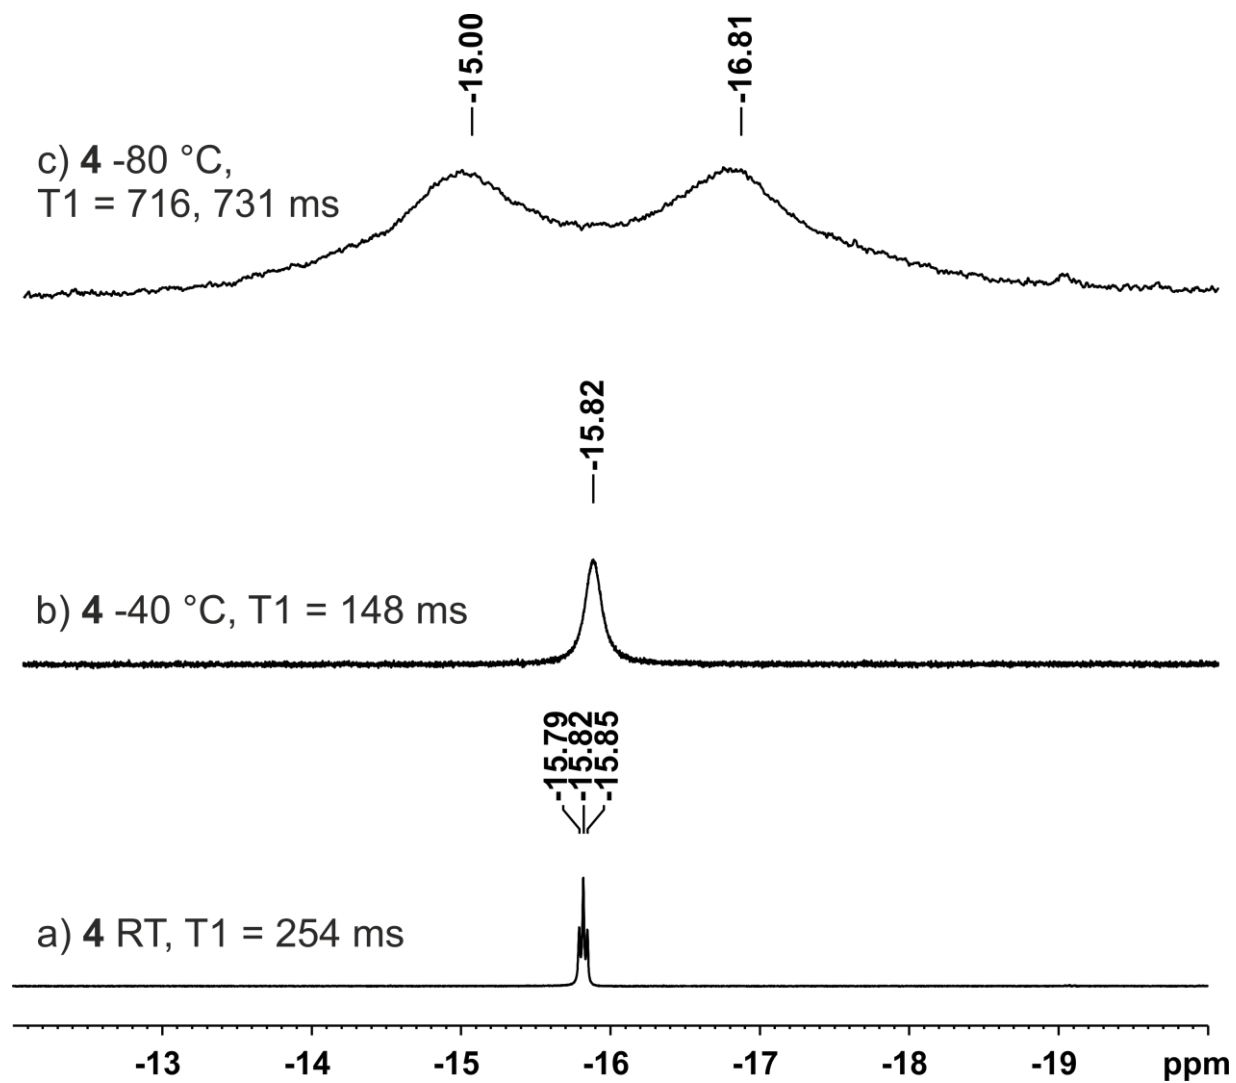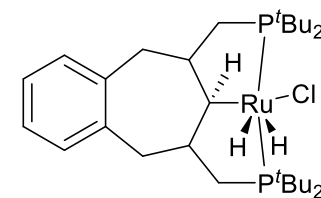

**4**

Figure S10.  $^1\text{H}$  VT NMR and determination of relaxation times of the Ru-H units.

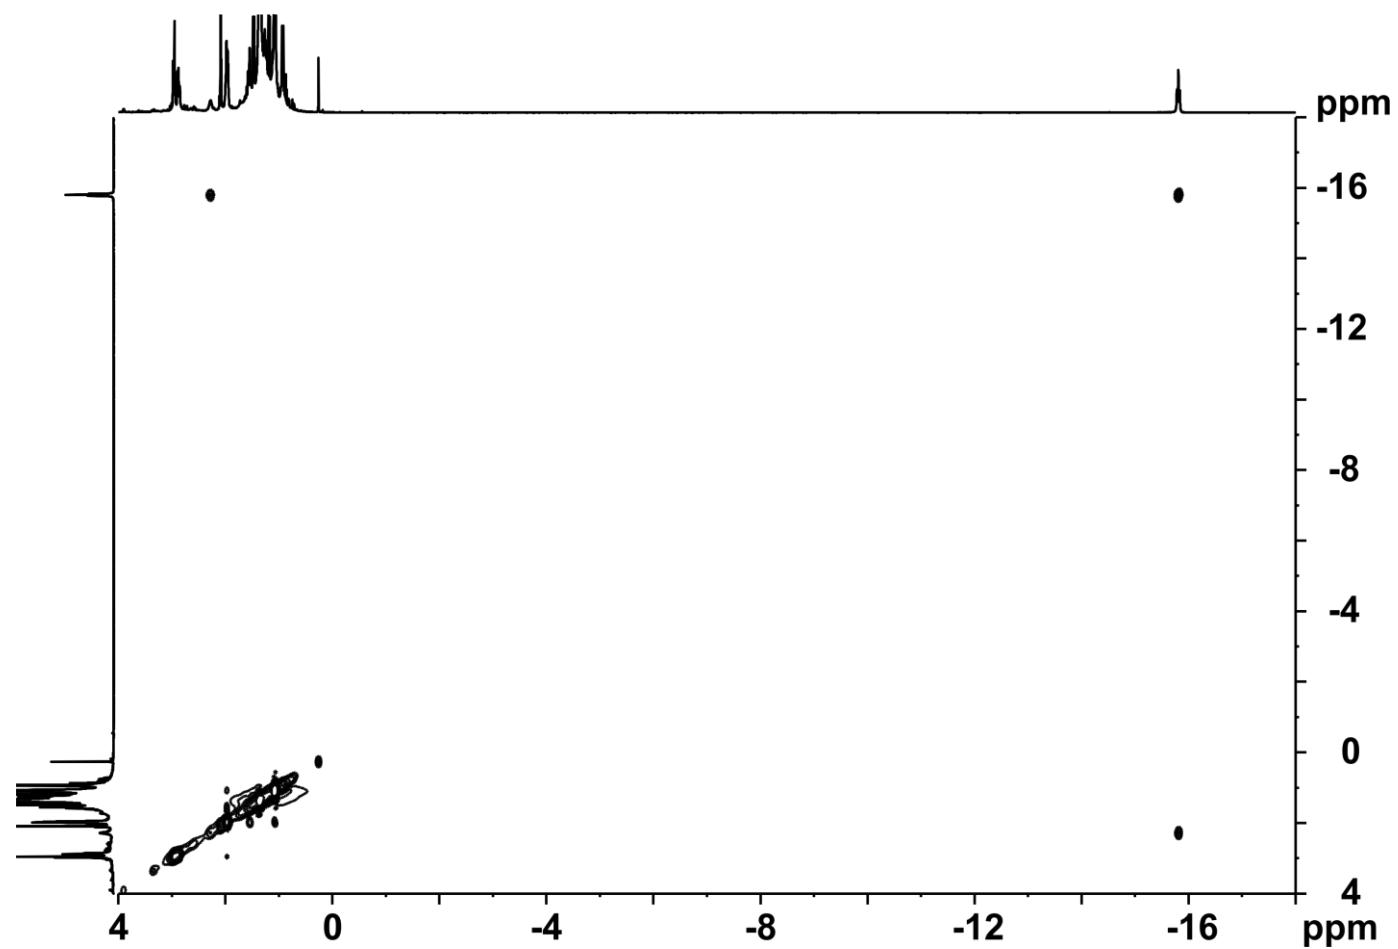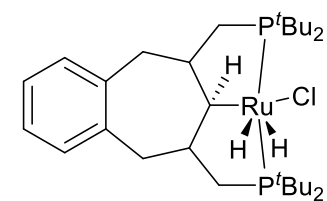

**4**

Figure S11. <sup>1</sup>H NOESY of **4** showing the exchange of the protons of the CH and RuH units.

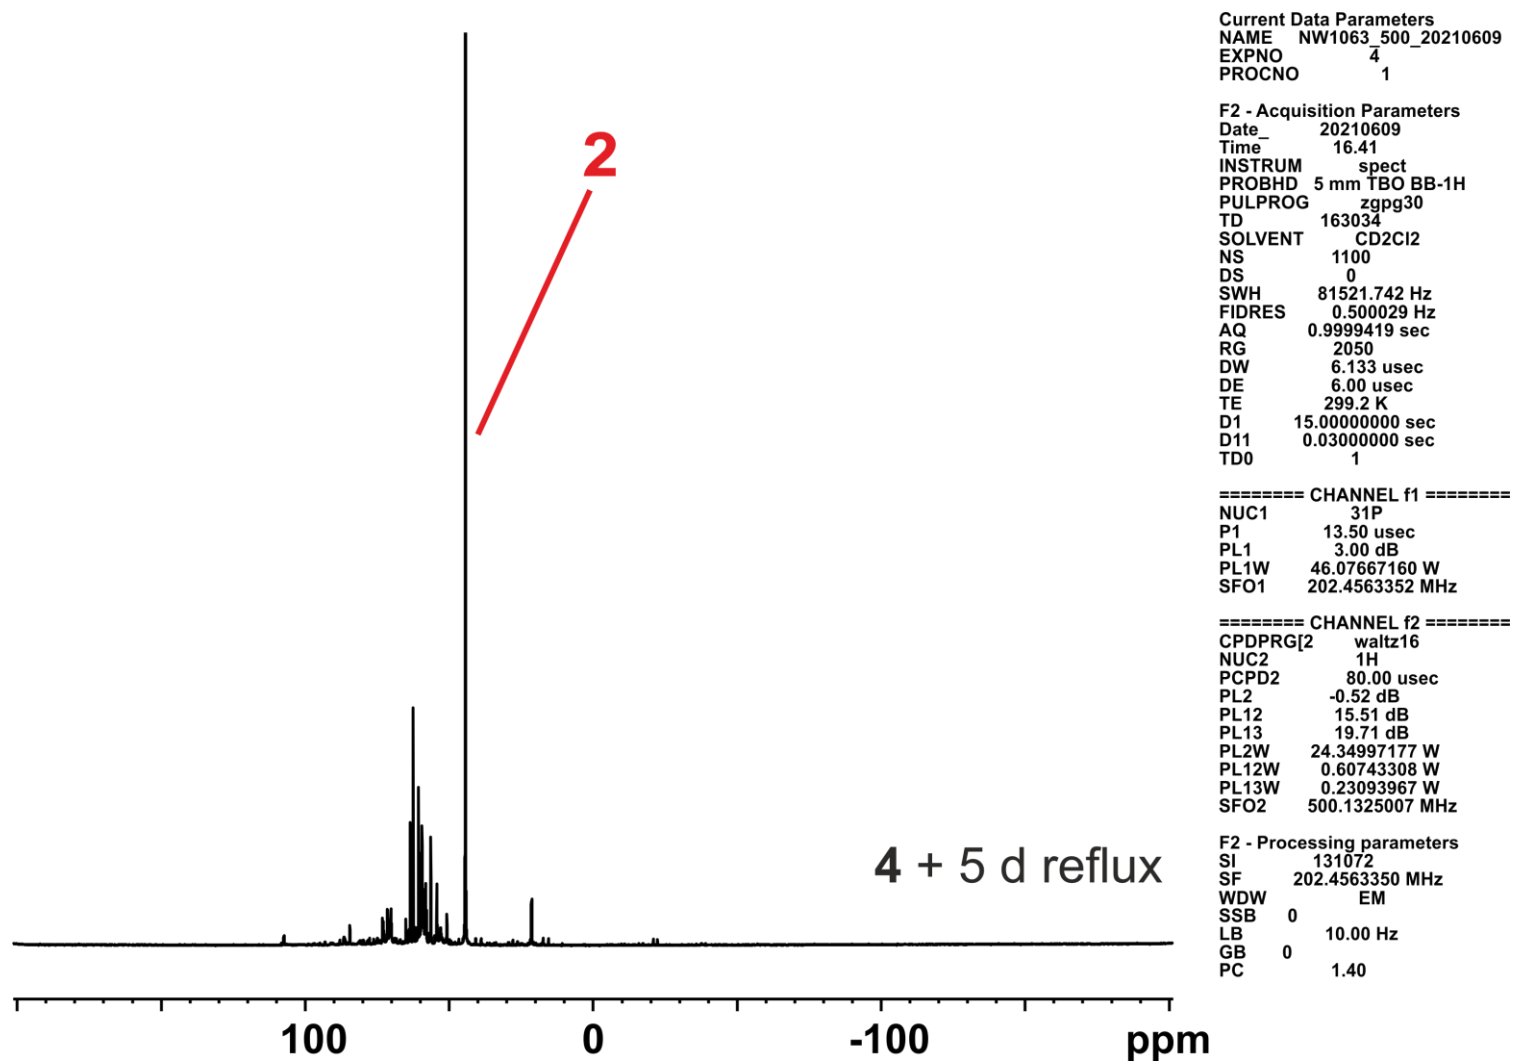

Figure S12.  $^{31}\text{P}\{^1\text{H}\}$  NMR spectra of the dehydrogenation of **4** after 5 days under reflux in toluene. D1 was adjusted according to the longest spin lattice relaxation time.



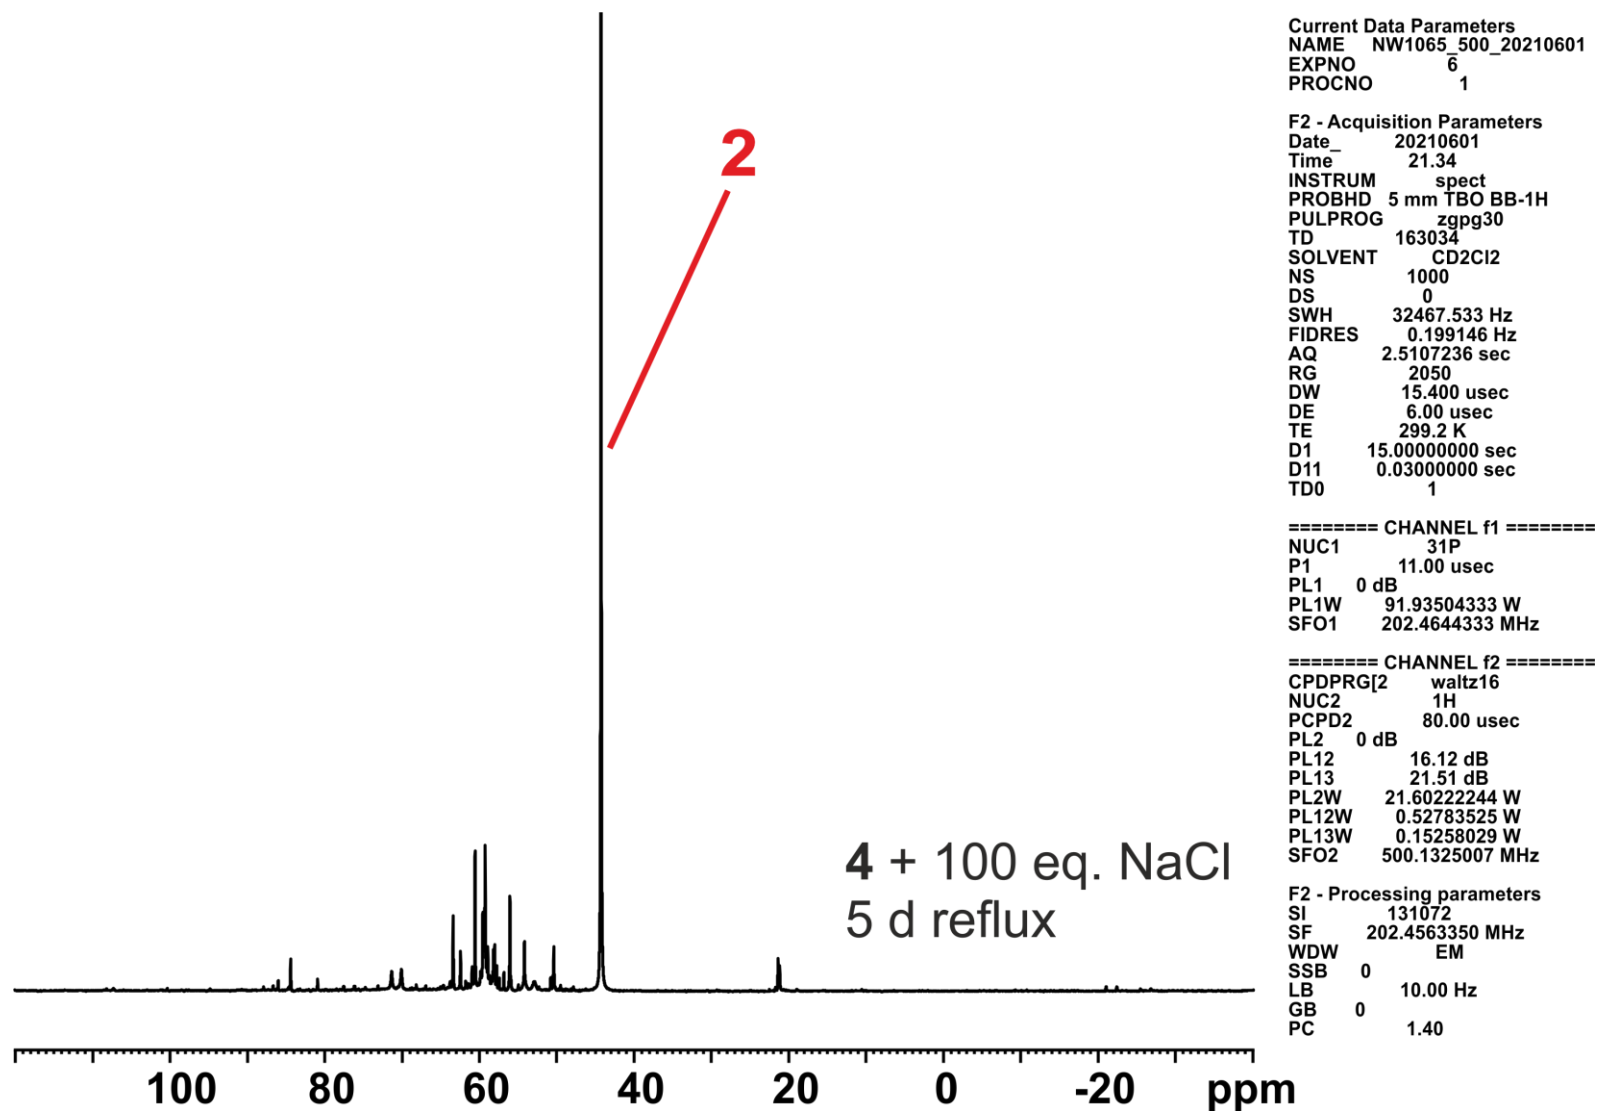

Figure S13.  $^{31}\text{P}\{^1\text{H}\}$  NMR spectra of the dehydrogenation of **4** after 5 days under reflux in toluene. D1 was adjusted according to the longest spin lattice relaxation time.

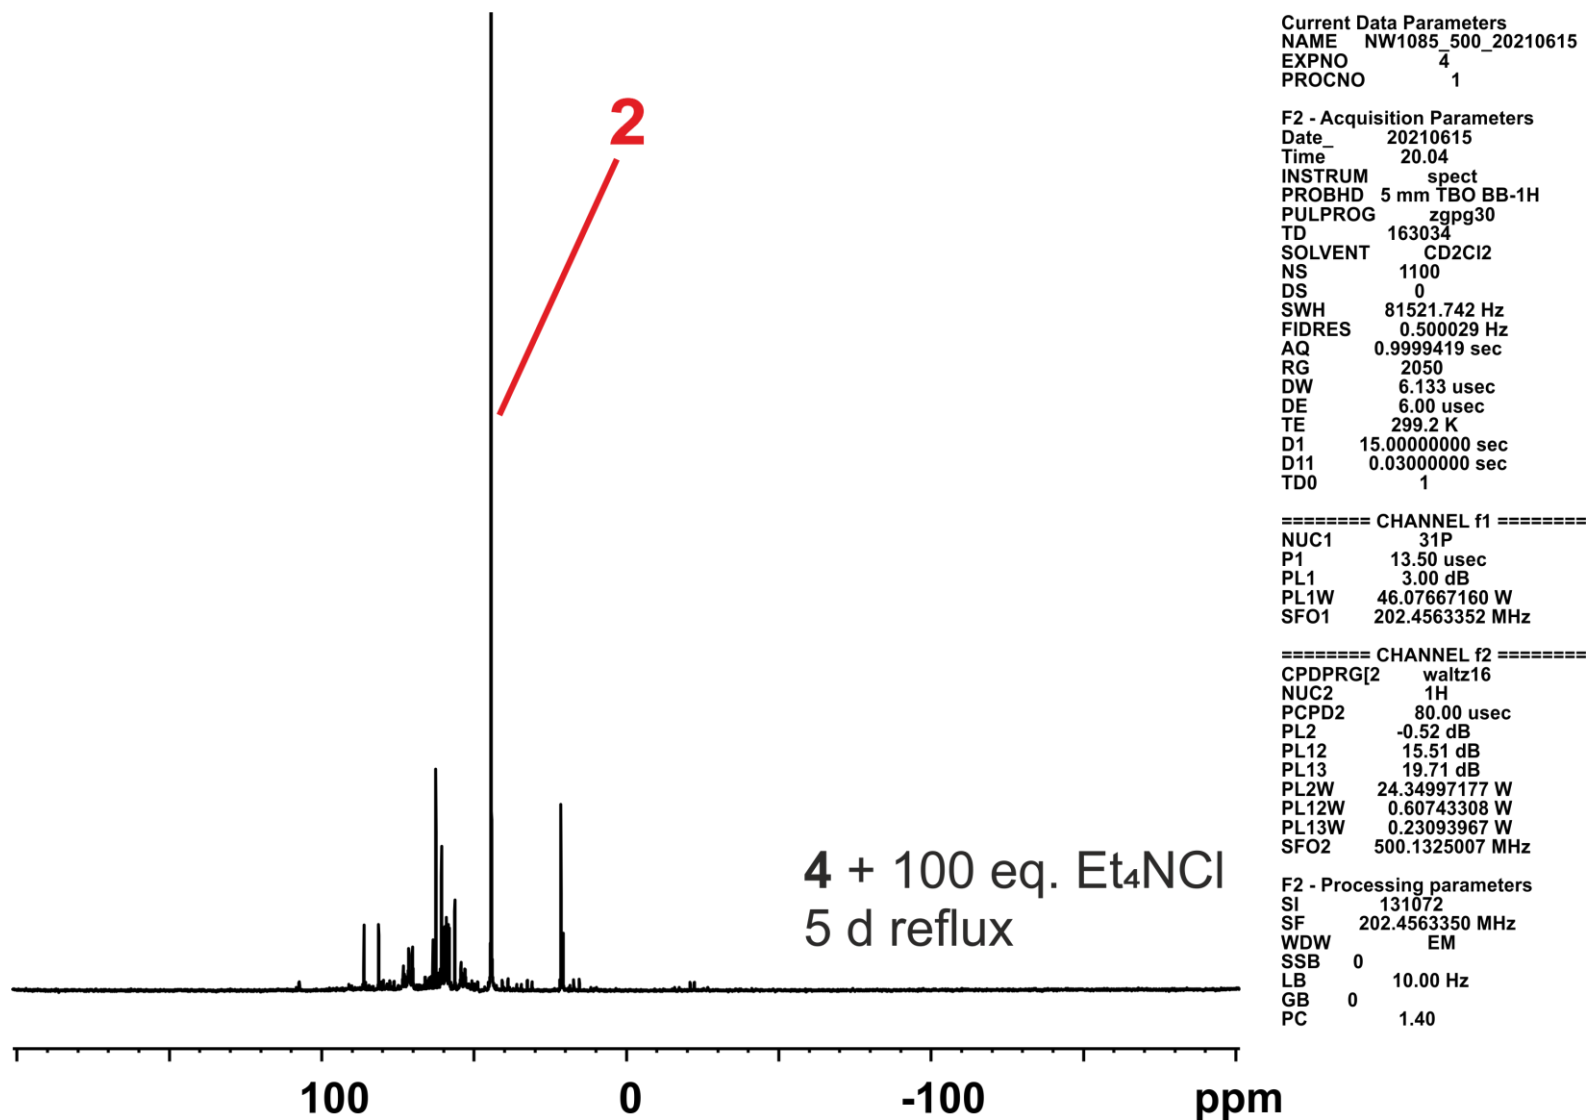

Figure S14.  $^{31}\text{P}\{^1\text{H}\}$  NMR spectra of the dehydrogenation of **4** after 5 days under reflux in toluene. D1 was adjusted according to the longest spin lattice relaxation time.

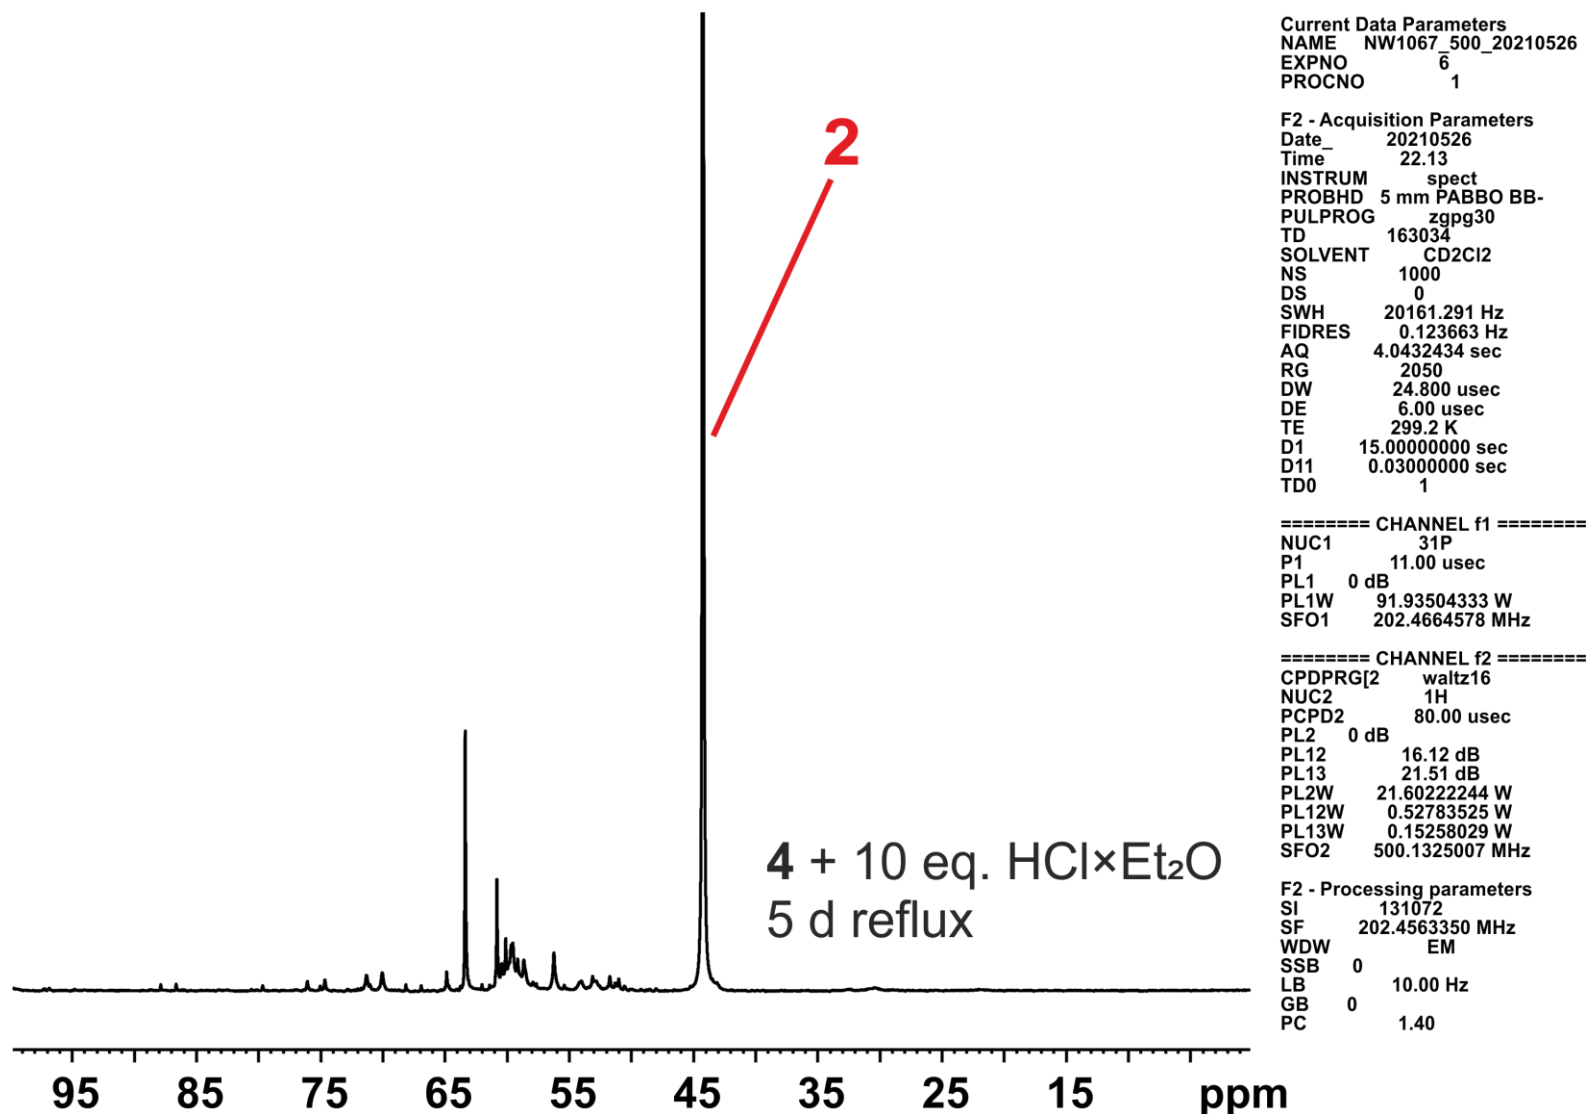

Figure S15.  $^{31}\text{P}\{^1\text{H}\}$  NMR spectra of the dehydrogenation of **4** after 5 days under reflux in toluene. D1 was adjusted according to the longest spin lattice relaxation time.

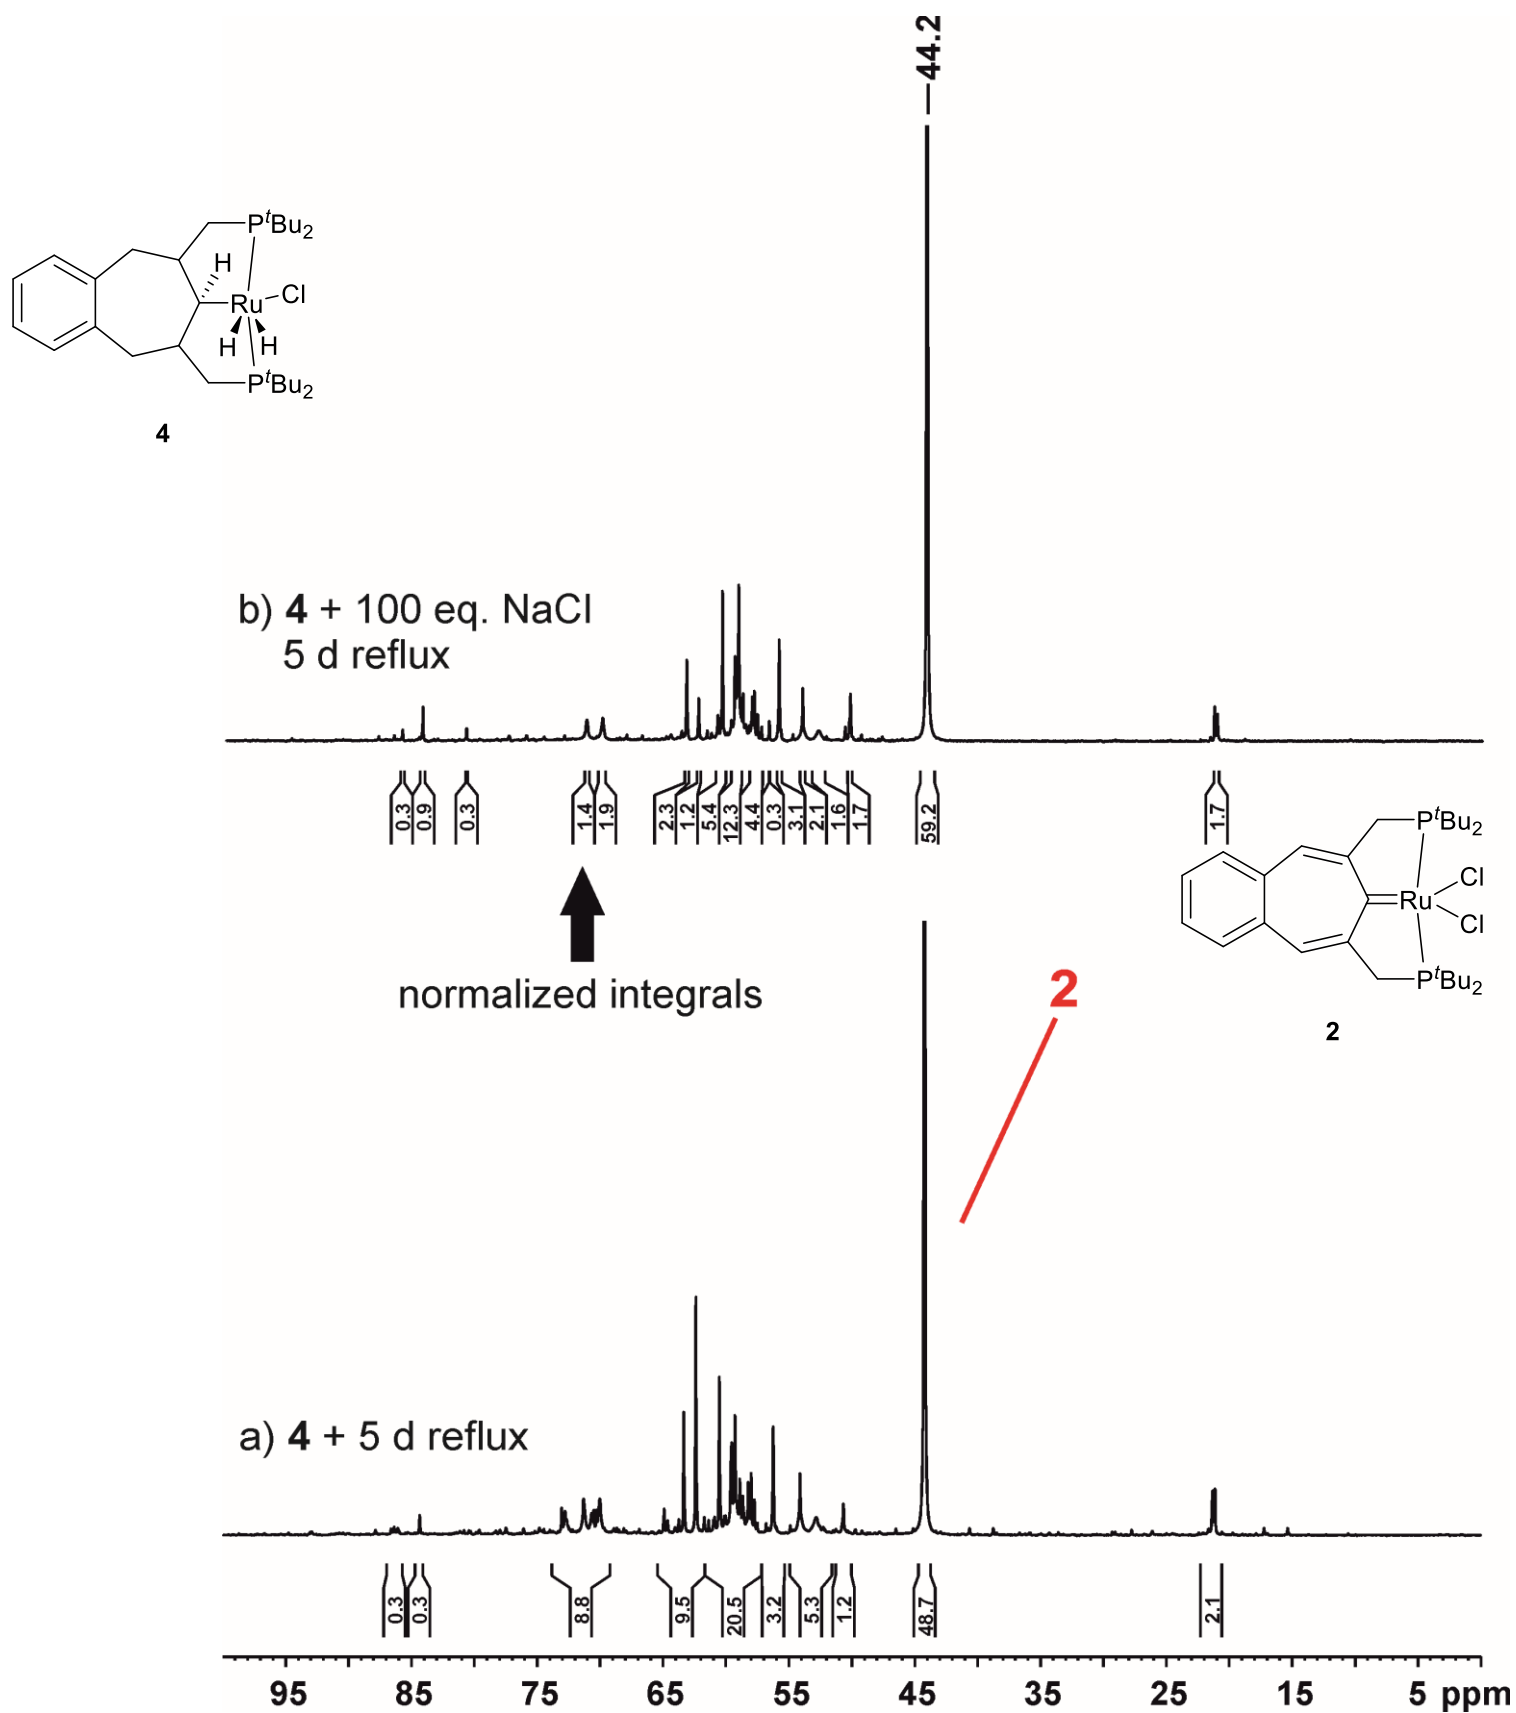

Figure S16.  $^{31}\text{P}\{^1\text{H}\}$  NMR spectra of the dehydrogenation of **4** after 5 days under reflux in toluene. D1 was adjusted according to the longest spin lattice relaxation time.

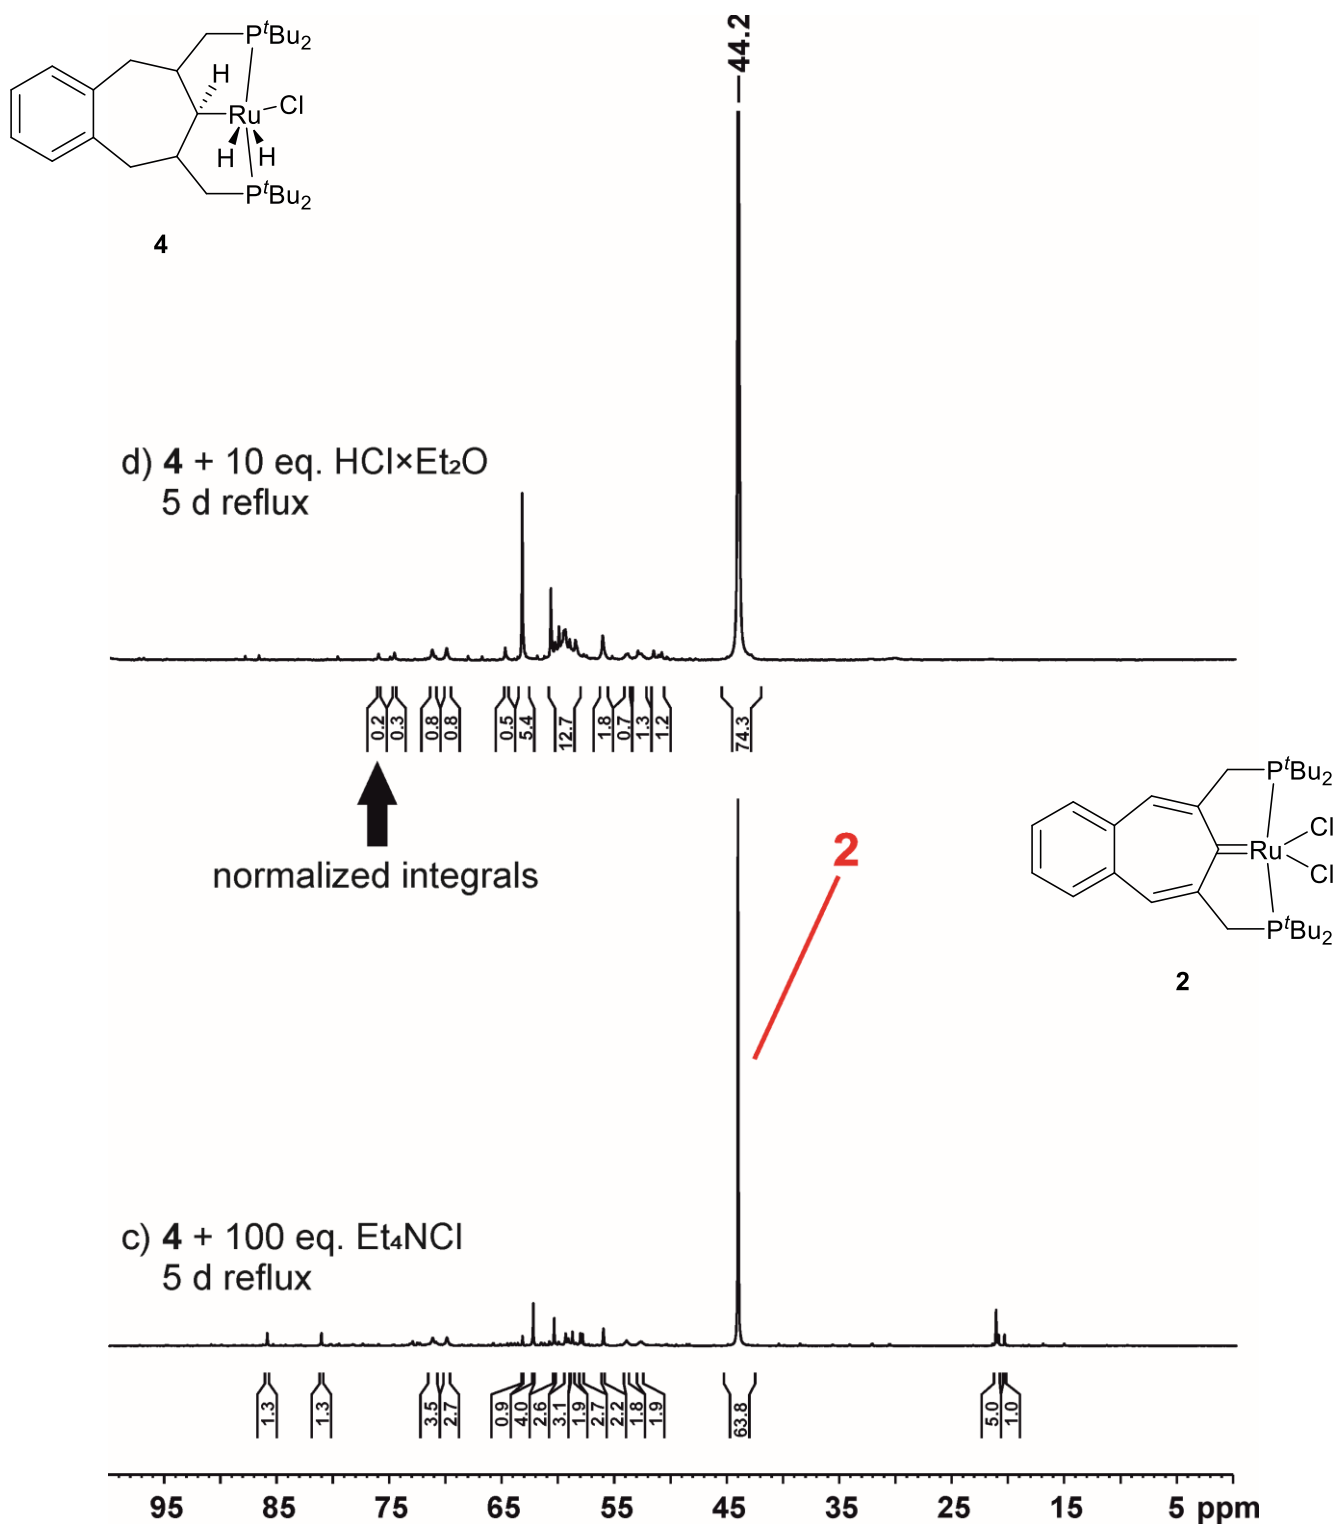

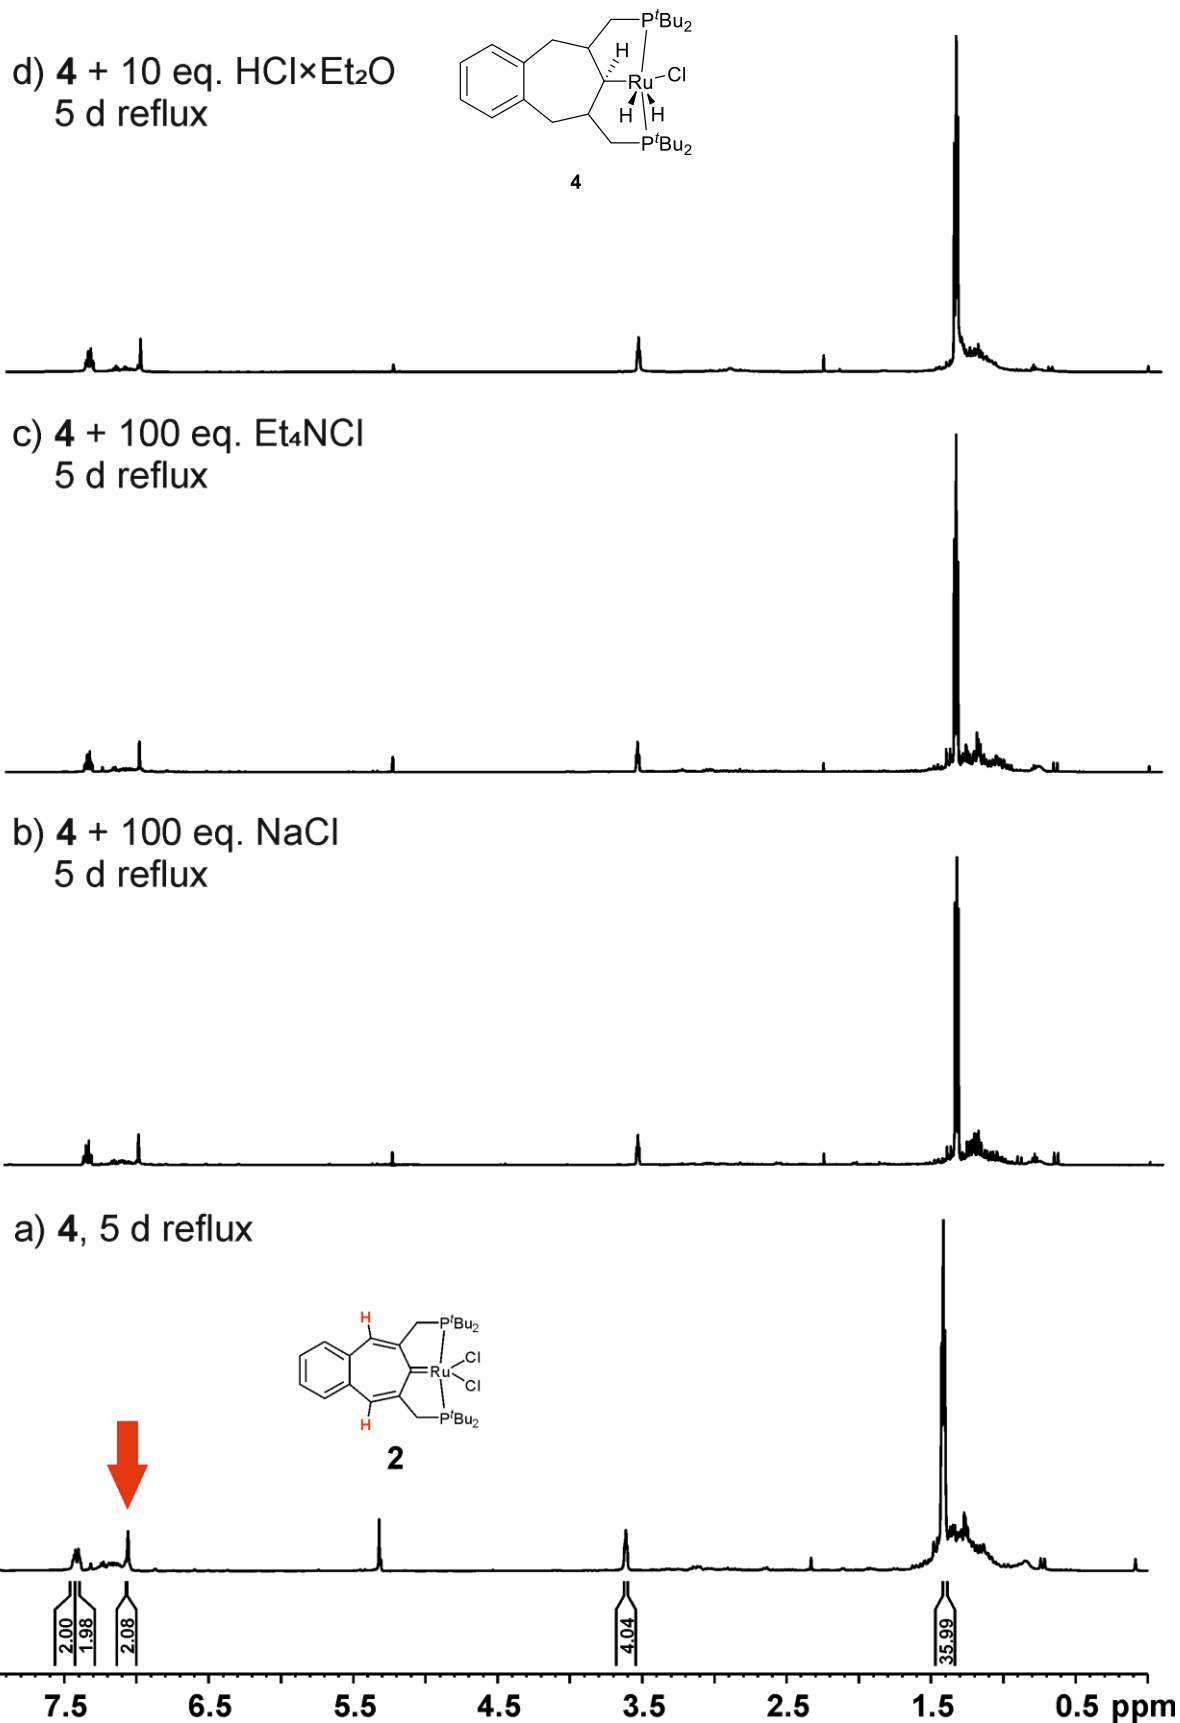

Figure S18. <sup>1</sup>H NMR spectra of the dehydrogenation of **4** after 5 days under reflux in toluene.

3.4  $^1\text{H}$ ,  $^{13}\text{C}\{^1\text{H}\}$ ,  $^{31}\text{P}\{^1\text{H}\}$  spectra for compound **5**

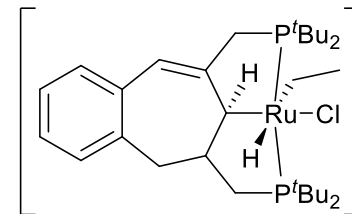

**5**

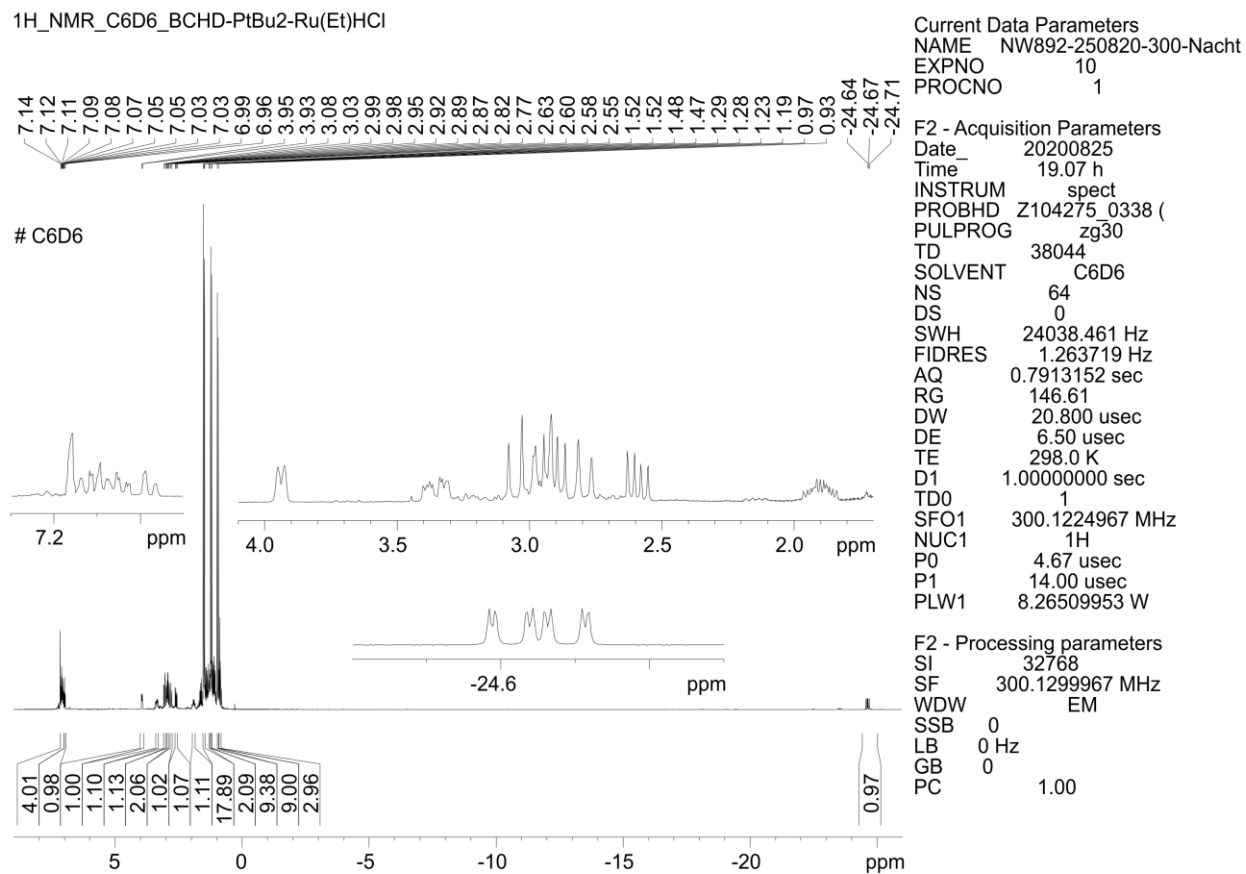

Figure S19.  $^1\text{H}$  NMR spectrum of complex **5**.

13C\_NMR\_C6D6\_BCHD-PtBu2-Ru(Et)HCl

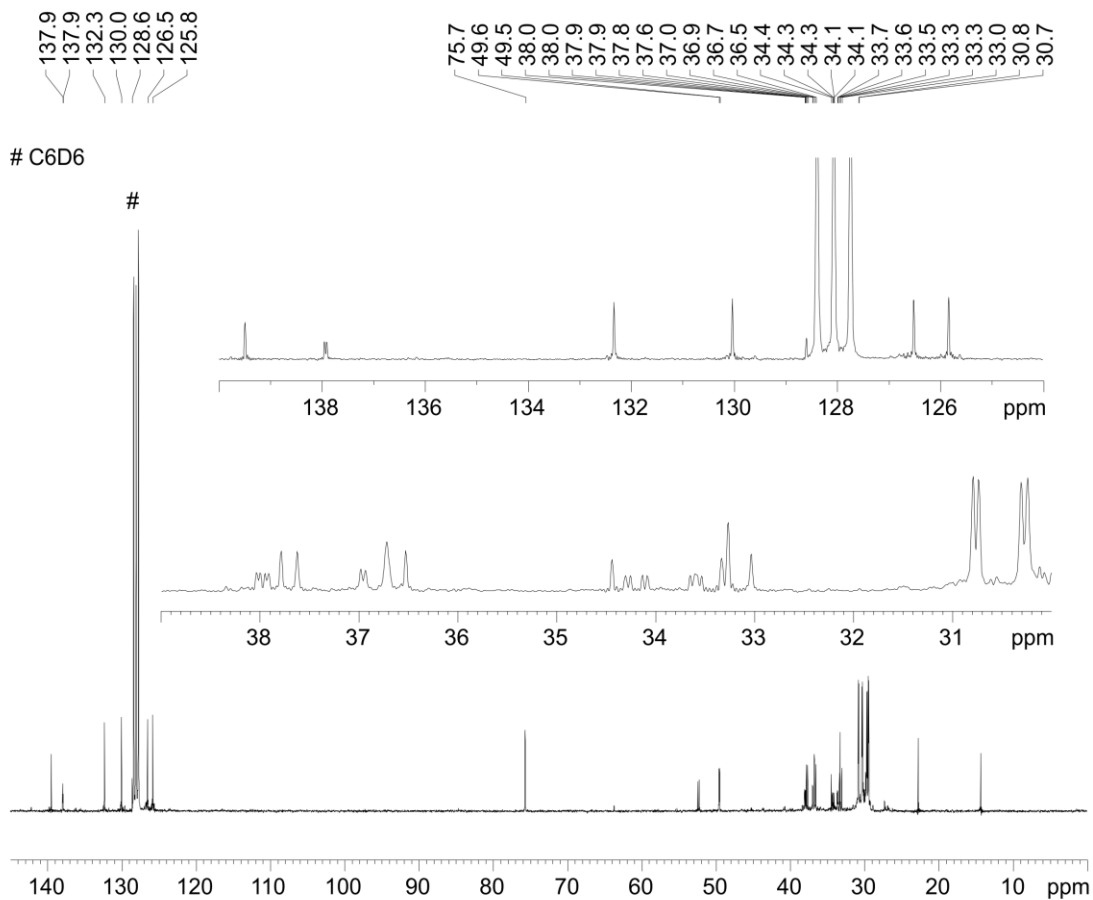

Current Data Parameters  
NAME NW892-250820-300-Nacht  
EXPNO 16  
PROCNO 1

F2 - Acquisition Parameters  
Date\_ 20200826  
Time\_ 4.16 h  
INSTRUM spect  
PROBHD Z104275\_0338 (  
PULPROG udef1  
TD 13040  
SOLVENT C6D6  
NS 4096  
DS 4  
SWH 18115.941 Hz  
FIDRES 2.778519 Hz  
AQ 0.3599040 sec  
RG 204.67  
DW 27.600 usec  
DE 6.50 usec  
TE 298.0 K  
D1 4.00000000 sec  
D12 0.00002000 sec  
D20 20.00000000 sec  
TD0 1  
SFO1 75.4752953 MHz  
NUC1 13C  
P1 10.00 usec  
P13 2000.00 usec  
P26 500.00 usec  
PLW1 33.55099869 W  
SPNAM[5] Crp60comp.4  
SPOAL5 0.500  
SPOFFS5 0 Hz  
SPW5 5.12620020 W  
SPNAM[8] Crp60.0.5.20.1  
SPOAL8 0.500  
SPOFFS8 0 Hz  
SPW8 5.12620020 W  
SFO2 300.1312005 MHz  
NUC2 1H  
CPDPRG[2] waltz16  
PCPD2 90.00 usec  
PLW2 8.26509953 W  
PLW12 0.20000000 W

F2 - Processing parameters  
SI 32768  
SF 75.4677203 MHz  
WDW EM  
SSB 0  
LB 1.00 Hz  
GB 0  
PC 1.40

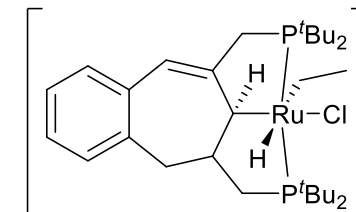

Figure S20.  $^{13}\text{C}\{^1\text{H}\}$  NMR spectrum of complex 5.



31P\_NMR\_C6D6\_BCHD-PtBu2-Ru(Et)HCl

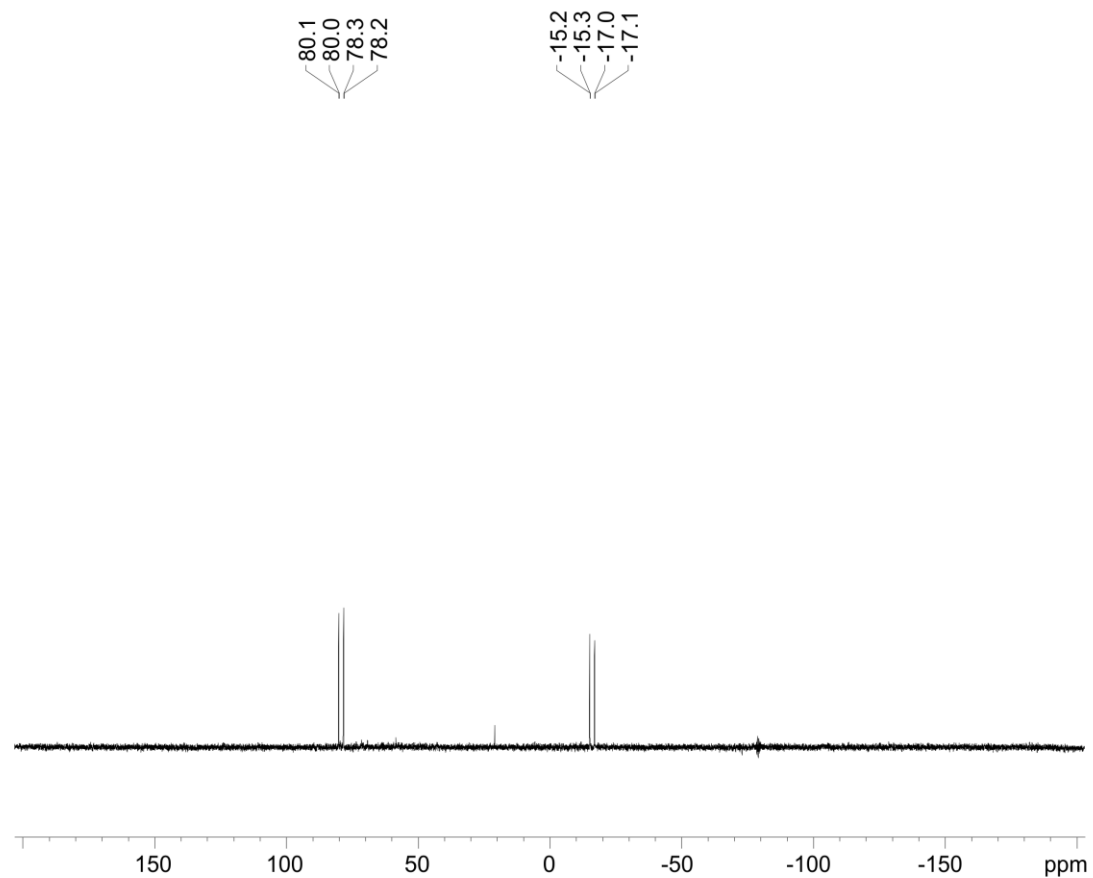

Current Data Parameters  
NAME NW892-190820-1  
EXPNO 11  
PROCNO 1

F2 - Acquisition Parameters  
Date\_ 20200819  
Time\_ 11.20  
INSTRUM spect  
PROBHD 5 mm QNP 1H/13  
PULPROG zgpg30  
TD 88150  
SOLVENT C6D6  
NS 128  
DS 0  
SWH 65789.477 Hz  
FIDRES 0.746336 Hz  
AQ 0.6699400 sec  
RG 23100  
DW 7.600 usec  
DE 6.00 usec  
TE 300.2 K  
D1 1.00000000 sec  
D11 0.03000000 sec  
TD0 1

==== CHANNEL f1 =====  
NUC1 31P  
P1 11.00 usec  
PL1 -3.00 dB  
PL1W 45.10684967 W  
SFO1 161.9674970 MHz

==== CHANNEL f2 =====  
CPDPRG2 waltz16  
NUC2 1H  
PCPD2 80.00 usec  
PL2 -3.00 dB  
PL12 11.77 dB  
PL13 13.14 dB  
PL2W 16.03799057 W  
PL12W 0.53474891 W  
PL13W 0.39007664 W  
SFO2 400.1120007 MHz

F2 - Processing parameters  
SI 131072  
SF 161.9674970 MHz  
WDW EM  
SSB 0  
LB 3.00 Hz  
GB 0  
PC 1.40

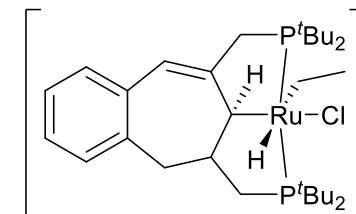

5

Figure S21.  $^{31}\text{P}\{^1\text{H}\}$  NMR spectrum of complex 5.

## 4 Quantum chemical calculations

On the basis of the molecular structures of **2** determined in the solid state the structure was optimized using the programme Orca4.2<sup>[1]</sup> with BP86,<sup>[2]</sup> Grimme's dispersion correction and Becke-Johnson damping (D3B)<sup>[3]</sup> making use of the resolution of identity (RI) approximation. The basis set chosen was def2-TZVP for Ru and def2-SVP for all other elements as implemented in ORCA4.2.<sup>[4]</sup> For all calculations *tight* convergence criteria for optimisations and *verytight* for SCF convergence were applied with *grid6* and *finalgrid7* gridsizes. Absence of imaginary frequencies on this level of theory confirmed local minima on the PES. The electronic structure of **2** was analysed using NBO7.<sup>[5]</sup>

### Ru-C bond

$\sigma$ -type (1.88) 44.2 % Ru, 55.8 % C,

$\pi$ -type (1.86) 67.5 % Ru, 32.5 % C

charges: Ru (-0.066), C19 (+0.029)

Wiberg index Ru-C 1.1967

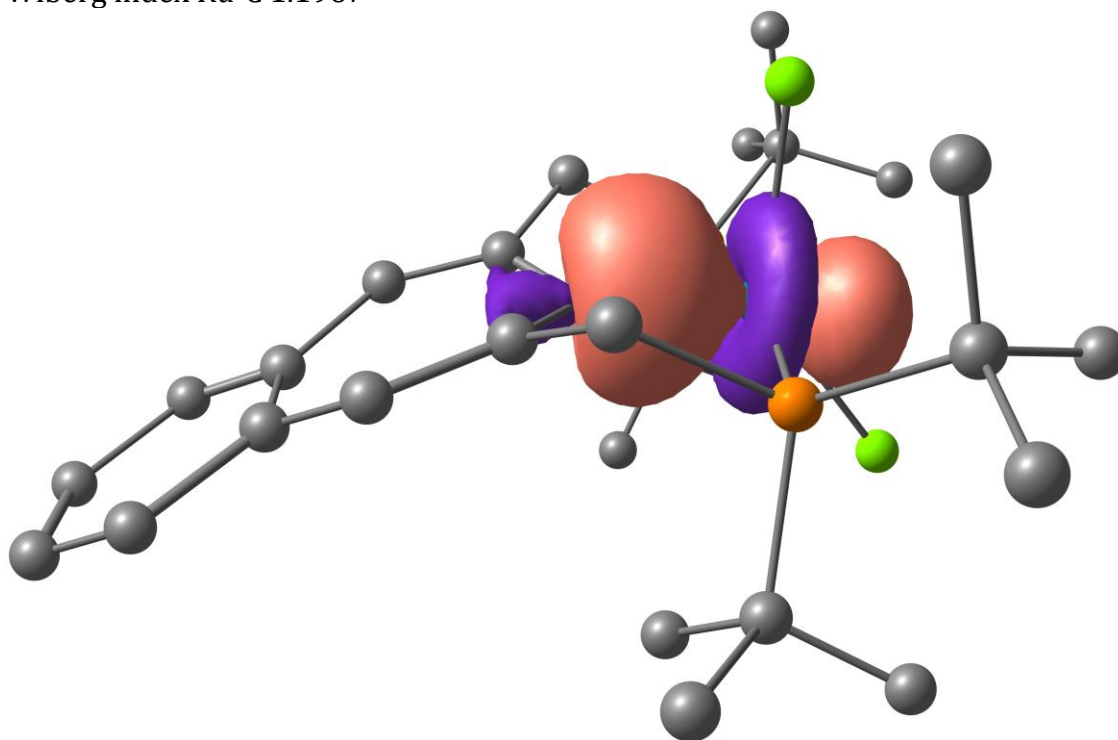

Figure S22. NBO of  $\sigma$ -type Ru-C interaction in **2**.

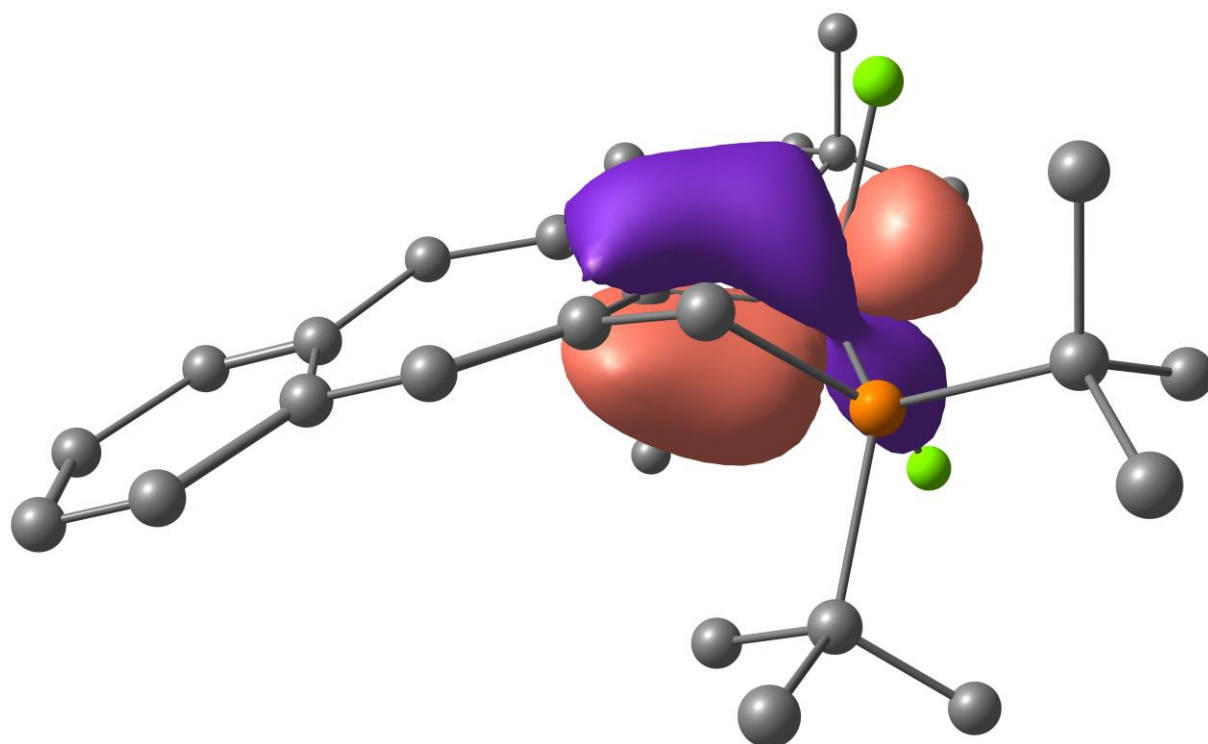

Figure S23. NBO of  $\pi$ -type Ru-C interaction in **2**

Table S2. Comparison of measured and calculated structural data of **2**.

|            | X-ray data | calculated |
|------------|------------|------------|
| Ru-Cl1     | 2.3227(10) | 2.352      |
| Ru-Cl2     | 2.3754(11) | 2.377      |
| Ru-C1      | 1.909(4)   | 1.915      |
| Ru-P1      | 2.3850(11) | 2.366      |
| Ru-P2      | 2.3900(11) | 2.367      |
| P2-Ru-P1   | 169.0(1)   | 168.3      |
| Cl1-Ru-C1  | 93.7(1)    | 92.0       |
| Cl1-Ru-Cl2 | 136.7(1)   | 138.5      |

Table S3 Coordinates of **2** obtained from calculations.

|    |                   |                  |                  |
|----|-------------------|------------------|------------------|
| Ru | 14.04417010482033 | 3.64480713732179 | 2.35305275534754 |
| Cl | 14.41843275843287 | 4.82889729092952 | 0.35562212835836 |
| P  | 15.99305116840229 | 4.51022592831686 | 3.37932901255530 |
| Cl | 14.47690191417947 | 1.48770316548319 | 3.25209090436874 |
| P  | 11.86937892676040 | 2.97915548510786 | 1.70105414259268 |
| C  | 10.99638814715708 | 6.73162302094027 | 5.00561014098180 |
| C  | 9.81746456601134  | 7.01182332349709 | 5.74941796894226 |
| H  | 8.85318157310464  | 6.66947512245627 | 5.34215169037128 |
| C  | 9.85287556005903  | 7.69262890486731 | 6.96670800957147 |
| H  | 8.92128065731426  | 7.87935182415702 | 7.52180548386247 |
| C  | 11.08757961114786 | 8.14970911873892 | 7.47156379342108 |
| H  | 11.13048635583485 | 8.69720255605818 | 8.42512439852368 |
| C  | 12.25622501697304 | 7.91465930399596 | 6.74659557298145 |

|   |                   |                  |                   |
|---|-------------------|------------------|-------------------|
| H | 13.22032061949640 | 8.28628738754388 | 7.12780966422292  |
| C | 12.25278075563248 | 7.19674821060833 | 5.51932506426097  |
| C | 13.52082600806634 | 7.04110687883067 | 4.84386572274087  |
| H | 14.31501249649698 | 7.68147028333373 | 5.26555079390998  |
| C | 13.93943287891878 | 6.19190529954095 | 3.84113957168456  |
| C | 13.16071806899457 | 5.14347921923919 | 3.15453832032664  |
| C | 11.71917613185429 | 5.36861115903194 | 2.93426404101739  |
| C | 10.83175770457716 | 6.04493661481996 | 3.74475892725339  |
| H | 9.78004750455870  | 6.00130292744674 | 3.41216565240532  |
| C | 15.39582382293180 | 6.26638848277301 | 3.42991774274178  |
| H | 15.98694760030519 | 6.96452871562933 | 4.05269292577326  |
| H | 15.44509694190039 | 6.59389263047903 | 2.36988810493786  |
| C | 11.15716211458682 | 4.69259097859790 | 1.70018242888367  |
| H | 11.60817655136617 | 5.16717478896560 | 0.80310692086770  |
| H | 10.05483485866230 | 4.76203629960864 | 1.63179353281245  |
| C | 17.68070165278165 | 4.49807571014344 | 2.47054769147180  |
| C | 16.23889777935290 | 4.03274066106565 | 5.22808933481245  |
| C | 18.90153637181388 | 4.87164443164237 | 3.32985166284371  |
| H | 19.08478153744647 | 4.17623756157330 | 4.16887911226746  |
| H | 18.81889089560132 | 5.89940423582230 | 3.73667939882440  |
| H | 19.80501380834020 | 4.85000481156965 | 2.68272526708326  |
| C | 17.82165617835881 | 3.07069521249911 | 1.90005978483805  |
| H | 17.83294095883426 | 2.29621523547756 | 2.69036602523547  |
| H | 18.76888282680192 | 2.99133769479168 | 1.32494028302306  |
| H | 16.98098269872682 | 2.83875465483154 | 1.21621468552654  |
| C | 17.61786696114093 | 5.50202260035004 | 1.30228282579063  |
| H | 17.60103664510402 | 6.55106062682194 | 1.66091347768888  |
| H | 16.73599083956812 | 5.33478780539413 | 0.65677147031585  |
| H | 18.53349846483891 | 5.38019012757959 | 0.68456961781152  |
| C | 14.85401876022377 | 3.77985918134021 | 5.86402475801057  |
| H | 15.00713068144695 | 3.52031032237402 | 6.93363095530775  |
| H | 14.33773351809626 | 2.93480435478009 | 5.37687920137305  |
| H | 14.19751526649250 | 4.66742759592329 | 5.82601568174136  |
| C | 16.92593748028307 | 5.16188477334237 | 6.02007357883549  |
| H | 17.08023635113759 | 4.82194582190195 | 7.06684990962586  |
| H | 16.29262134493801 | 6.07004530421915 | 6.06627170315228  |
| H | 17.91341946887957 | 5.44691182690626 | 5.61586877056708  |
| C | 11.54147901897578 | 2.21432943864627 | -0.02541188716642 |
| C | 17.03935407927609 | 2.71813159590807 | 5.32685645297901  |
| H | 17.07710752005140 | 2.40417430436977 | 6.39216819740268  |
| H | 18.08385849695781 | 2.81419181008125 | 4.97720329454243  |
| H | 16.53999270077990 | 1.91434861921834 | 4.75216103956129  |
| C | 10.85481694200170 | 2.03796445630822 | 3.03984126425478  |
| C | 12.63053027787853 | 1.13499816161277 | -0.20330130381868 |
| H | 12.56633951813870 | 0.33644893065266 | 0.55998521444708  |
| H | 13.64112915533773 | 1.58434321710424 | -0.13308097980317 |
| H | 12.52856711609781 | 0.66485797398226 | -1.20473293375849 |
| C | 10.13692610323140 | 1.62074732709490 | -0.23288388973692 |
| H | 9.34551211050463  | 2.38840600084141 | -0.11874544264130 |
| H | 9.90669769447560  | 0.77678721276467 | 0.44223446154844  |
| H | 10.06915609574185 | 1.23628965190240 | -1.27361981425285 |
| C | 11.74014394445612 | 3.30839681783907 | -1.09317957291355 |
| H | 12.71192368931553 | 3.82430233341660 | -0.98423304245328 |
| H | 10.93132528908141 | 4.06617167338231 | -1.06241291562955 |
| H | 11.70584744793848 | 2.83112808758834 | -2.09607858379772 |
| C | 11.11083898192983 | 0.52176868292472 | 2.92028181478223  |
| H | 10.60405502627133 | 0.00808865945318 | 3.76537697236857  |
| H | 12.19405652459377 | 0.30362924308919 | 2.98915155682280  |
| H | 10.71424050036194 | 0.08293435234182 | 1.98611424226081  |
| C | 9.35040134549399  | 2.35603962085678 | 2.94020910246703  |
| H | 9.14444795842237  | 3.42233784291246 | 3.16050952574316  |
| H | 8.80702184505569  | 1.75778860490434 | 3.70306366475418  |
| H | 8.91209888137672  | 2.11348241540851 | 1.95590429856295  |
| C | 11.34321346039585 | 2.48012250920384 | 4.43713415084134  |
| H | 10.74137498468103 | 1.94069371562093 | 5.19981836834629  |
| H | 11.21309205033410 | 3.56280278388160 | 4.61327891769027  |
| H | 12.40460133208815 | 2.22028834801993 | 4.59179321473299  |

## 5 References

- [1] a) F. Neese, *Wiley Interdiscip. Rev. Comput. Mol. Sci.* **2018**, *8*, e1327; b) F. Neese, *Wiley Interdiscip. Rev. Comput. Mol. Sci.* **2012**, *2*, 73-78.

- [2] a) A. D. Becke, *Phys. Rev. A* **1988**, *38*, 3098-3100; b) J. P. Perdew, W. Yue, *Phys. Rev. B* **1986**, *33*, 8800-8802.
- [3] S. Grimme, S. Ehrlich, L. Goerigk, *J. Comput. Chem.* **2011**, *32*, 1456-1465.
- [4] a) F. Weigend, R. Ahlrichs, *Phys. Chem. Chem. Phys.* **2005**, *7*, 3297-3305; b) F. Weigend, *Phys. Chem. Chem. Phys.* **2006**, *8*, 1057-1065; c) B. Metz, H. Stoll, M. Dolg, *J. Chem. Phys.* **2000**, *113*, 2563-2569; d) D. Andrae, U. Häussermann, M. Dolg, H. Stoll, H. Preuß, *Theoret. Chim. Acta* **1990**, *77*, 123-141.
- [5] E. D. Glendening, J. K. Badenhop, A. E. Reed, J. E. Carpenter, J. A. Bohmann, C. M. Morales, P. Karafiloglou, C. R. Landis, F. Weinhold, Theoretical Chemical Institute, University of Wisconsin, Madison, **2018**.
